# Supplementary material for: FcγR engagement reprograms neutrophils into antigen cross-presenting cells that elicit acquired anti-tumor immunity
Source: PubMed Central journal article supplement (PMC8352912; doi:10.1038/s41467-021-24591-x), 2021-08-09
Supplement: 41467_2021_24591_MOESM1_ESM.pdf [file 41467_2021_24591_MOESM1_ESM.pdf]

## SUPPLEMENTARY INFORMATION

### **FcγR engagement reprograms neutrophils into antigen cross-presenting cells that elicit acquired anti-tumor immunity**

Vijayashree Mysore<sup>1</sup>, Xavier Cullere<sup>1</sup>, Joseph Mears<sup>2,3,4</sup>, Florencia Rosetti<sup>5</sup>, Kosu Okubo<sup>1#</sup>, Pei X. Liew<sup>1#</sup>, Fan Zhang<sup>2,3,4</sup>, Iris Madera-Salcedo<sup>5</sup>, Frank Rosenbauer<sup>6</sup>, Richard M. Stone<sup>7</sup>, Jon C. Aster<sup>1</sup>, Ulrich von Andrian<sup>8</sup>, Andrew Lichtman<sup>1</sup>, Soumya Raychaudhuri<sup>2,3,4,9</sup>, Tanya N. Mayadas<sup>1,10</sup>

**This PDF file includes:**

#### ***SUPPLEMENTARY FIGURES***

Supplementary Figure 1 (associated with Figure 1)  
Supplementary Figure 2 (associated with Figure 1)  
Supplementary Figure 3 (associated with Figure 1)  
Supplementary Figure 4 (associated with Figure 2)  
Supplementary Figure 5 (associated with Figure 5)  
Supplementary Figure 6 (associated with Figure 6)  
Supplementary Figure 7 (associated with Figure 7)  
Supplementary Figure 8 (associated with Figure 8)  
Supplementary Figure 9 (associated with Figure 8)  
Supplementary Figure 10 (associated with Figure 8)  
Supplementary Figure 11 (associated with Figure 8)  
Supplementary Figure 12 (associated with Figure 8)  
Supplementary Figure 13 (associated with Figure 8)  
Supplementary Figure 14 (associated with Figure 9)

#### ***SUPPLEMENTARY TABLES***

*Supplementary Table 1.* Demographic and clinical characteristics of SLE study population.  
*Supplementary Table 2.* Clinical characteristics of samples from patients with myeloid neoplasias.  
*Supplementary Table 3-6.* Source tables for antibodies used for flow cytometry.

# Supplementary Figure 1

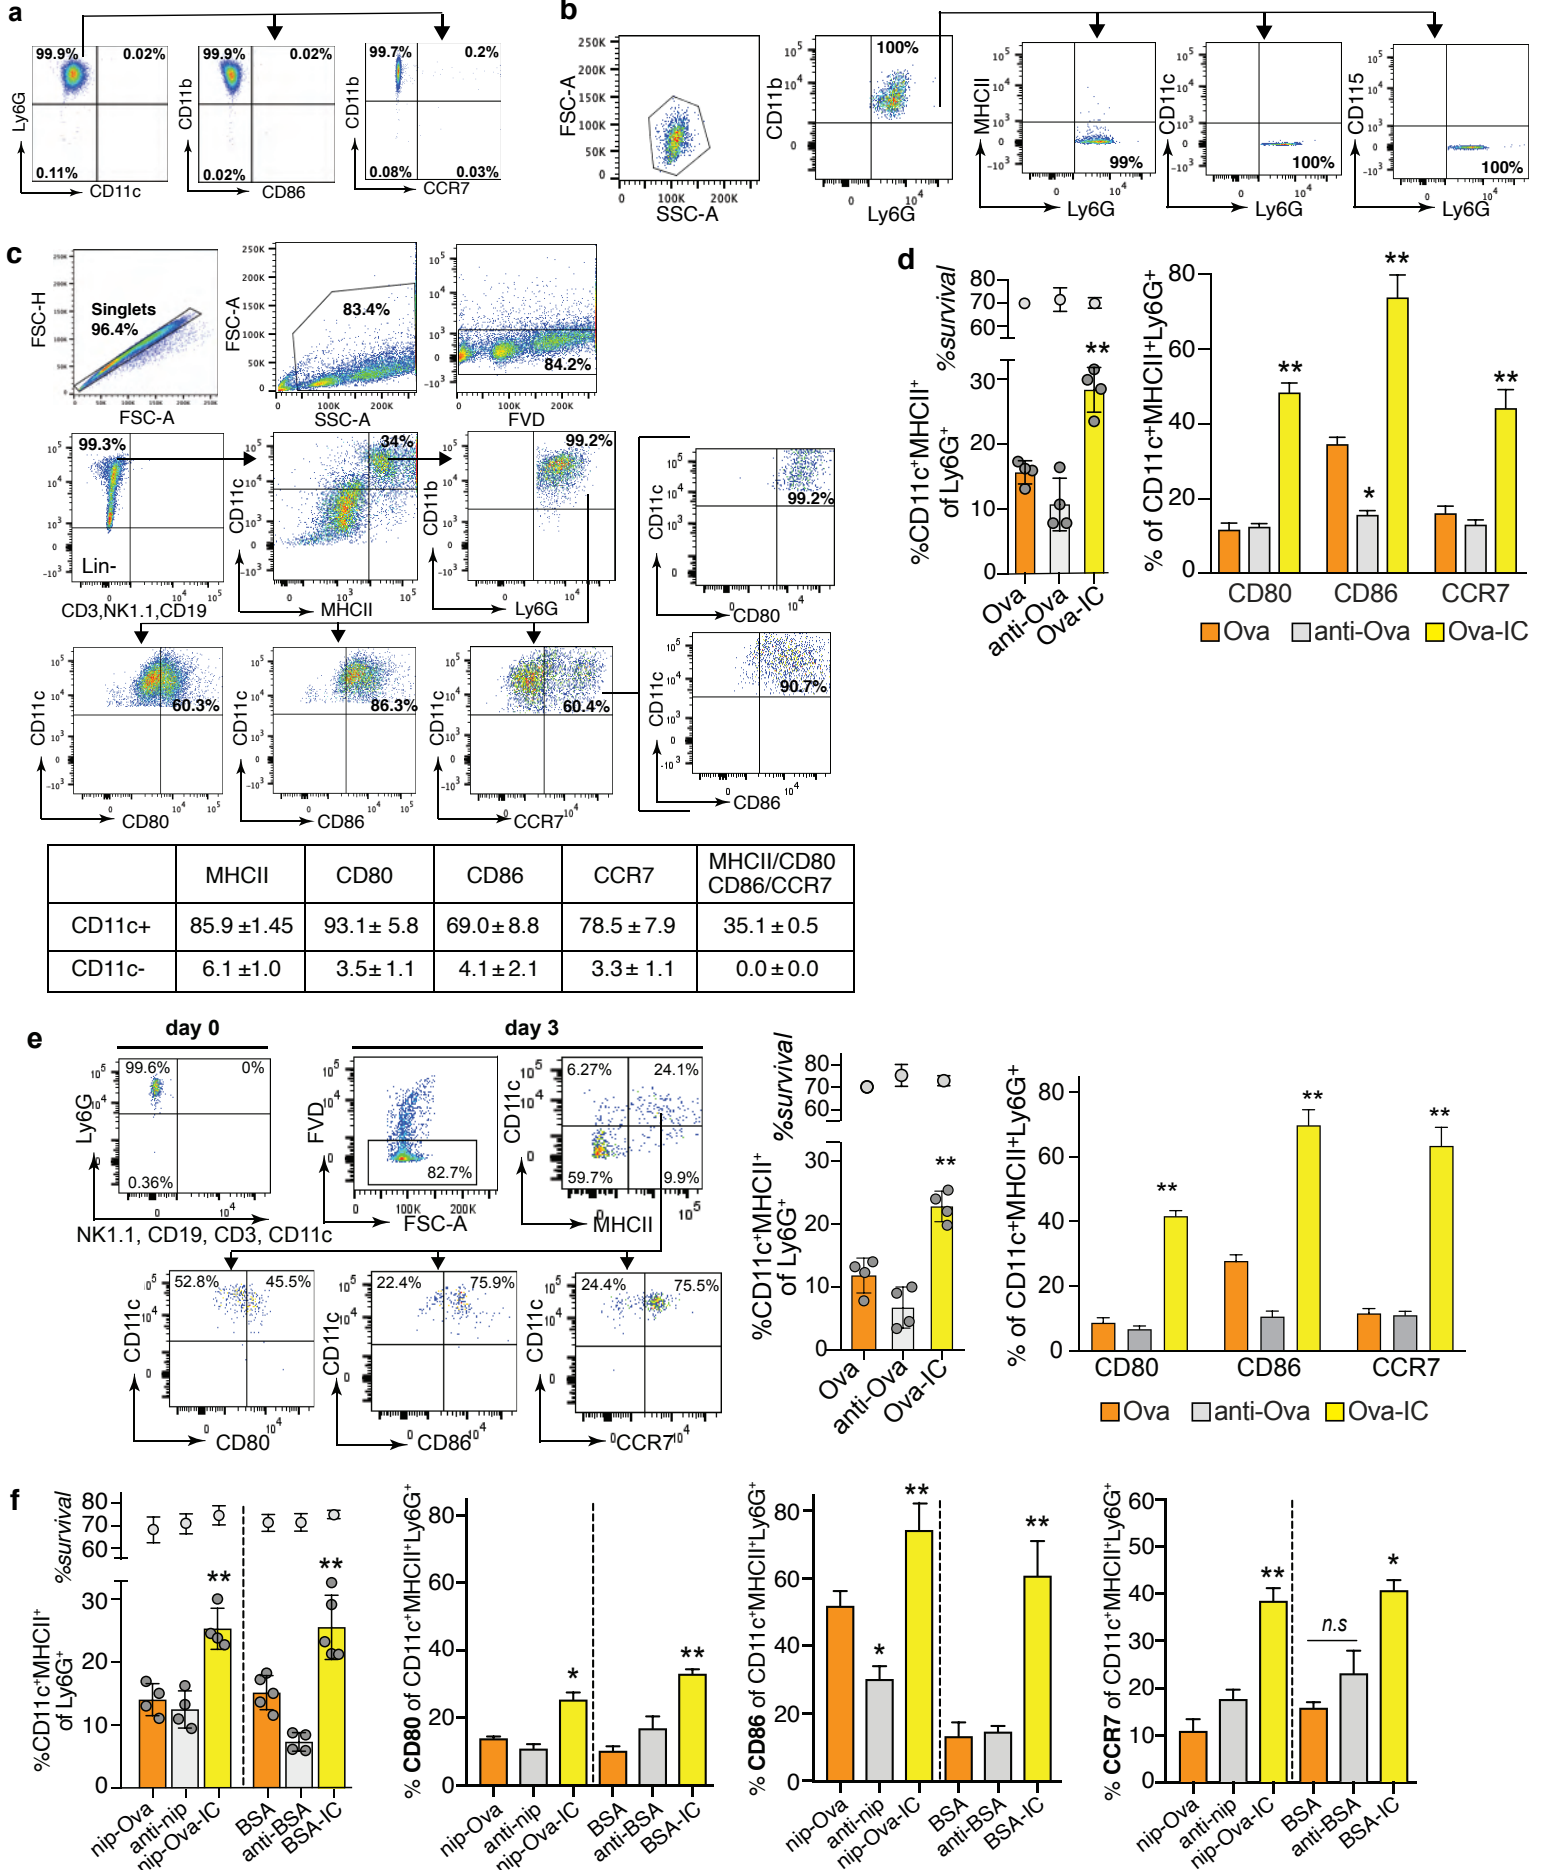

## Supplementary Figure 1, cont'd

**g**

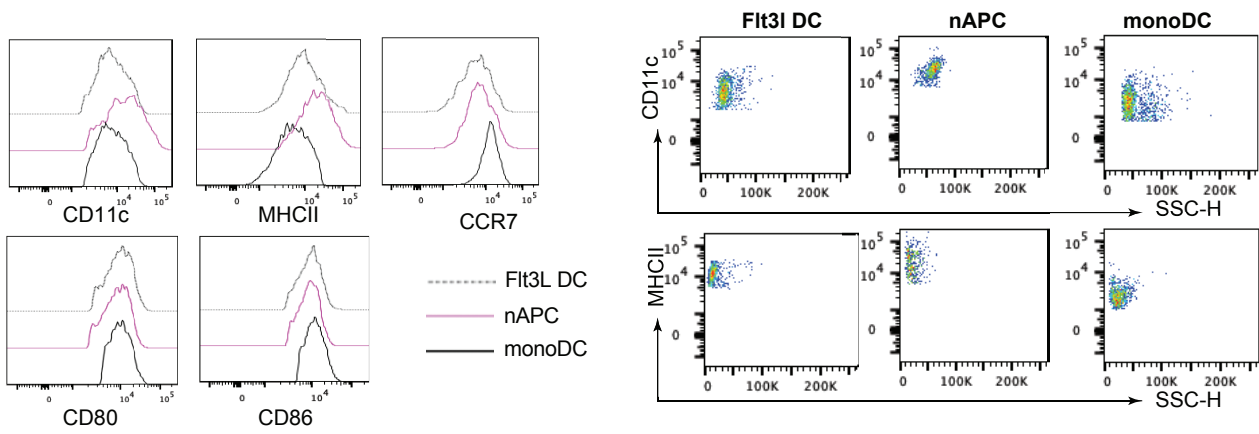

**h**

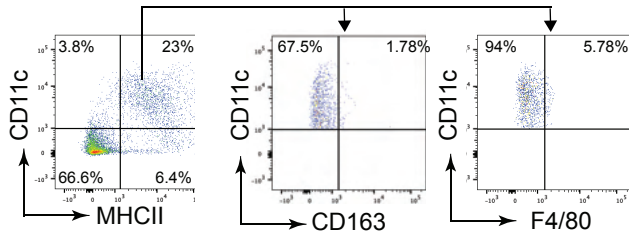

**i**

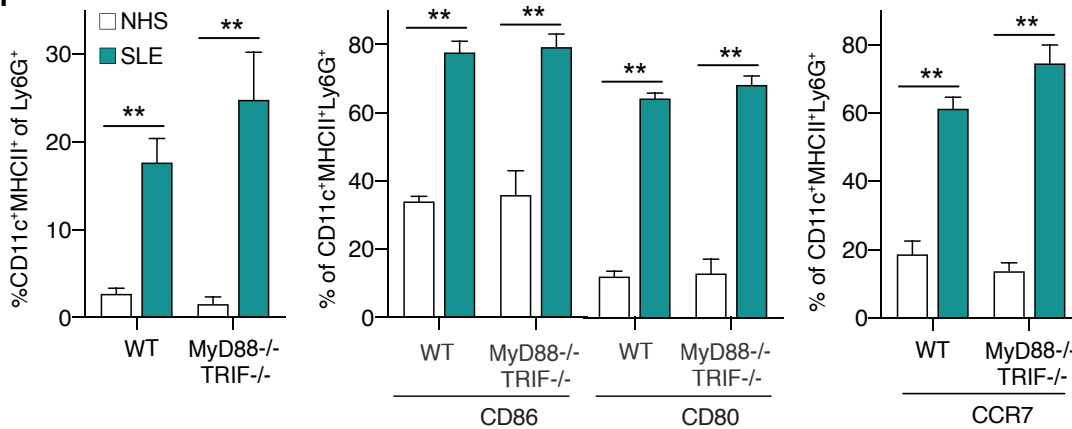

**Supplementary Figure 1 (associated with Figure 1). Gating strategies for flow cytometry data analysis and nAPC characterization.** **a)** Flow cytometric plots assessing purity of murine peripheral blood neutrophils, representative of 10 independent experiments with similar results. **b)** Flow plots assessing purity of bone marrow neutrophils from G-CSF treated mice and stained with indicated markers. **c)** Representative FACS gating strategy for nAPCs derived from Ova-IC treated neutrophils. Table shows percent of Ly6G<sup>+</sup> population that is positive or negative CD11c expressing the indicated markers. **d)** After 3 days, cells from (c) were evaluated by flow cytometry for survival and acquisition of CD11c and MHCII; the positive population was further analyzed for CD80, CD86 and CCR7. **e)** FACS plots for samples at days 0 and 3 from non-G-CSF treated BMNs (left panel). Bar graphs of percent of Ly6G<sup>+</sup> that acquire CD11c, MHCII and additionally CD80, CD86 and CCR7 after 3 day in culture (right panel). **f)** nAPCs were generated from BMNs using Nip-Ova/anti-Nip ICs (nip-Ova-ICs), BSA/anti-BSA ICs (BSA-ICs) or their individual components. After 3 days, Ly6G<sup>+</sup> cells were analyzed for CD11c<sup>+</sup>MHCII<sup>+</sup> and then further for CD80, CD86 and CCR7. **g)** Vertical half offset (left panel) of mean fluorescence intensities (MFI) and plots (right panel) for the indicated markers on Ova-IC-nAPC, splenic monocyte derived DCs (monoDC) and Flt3L-induced splenic DCs. **h)** Ova-IC generated nAPCs expressing CD11c and MHCII were analyzed for the macrophage markers CD163 and F4/80. **i)** BMNs from WT and MyD88<sup>-/-</sup> TRIF<sup>-/-</sup> mice were treated with Normal (NH) or SLE (SLE) sera and the percent nAPC generated was determined as in f). Data is mean ± s.e.m. d, e, f) One-way ANOVA and Dunnett's multiple comparison test; i) Student t-test for unpaired comparisons with Dunn-Bonferoni was used to determine significance. \*P<0.05 and \*\*P<0.005.

## Supplementary Figure 2

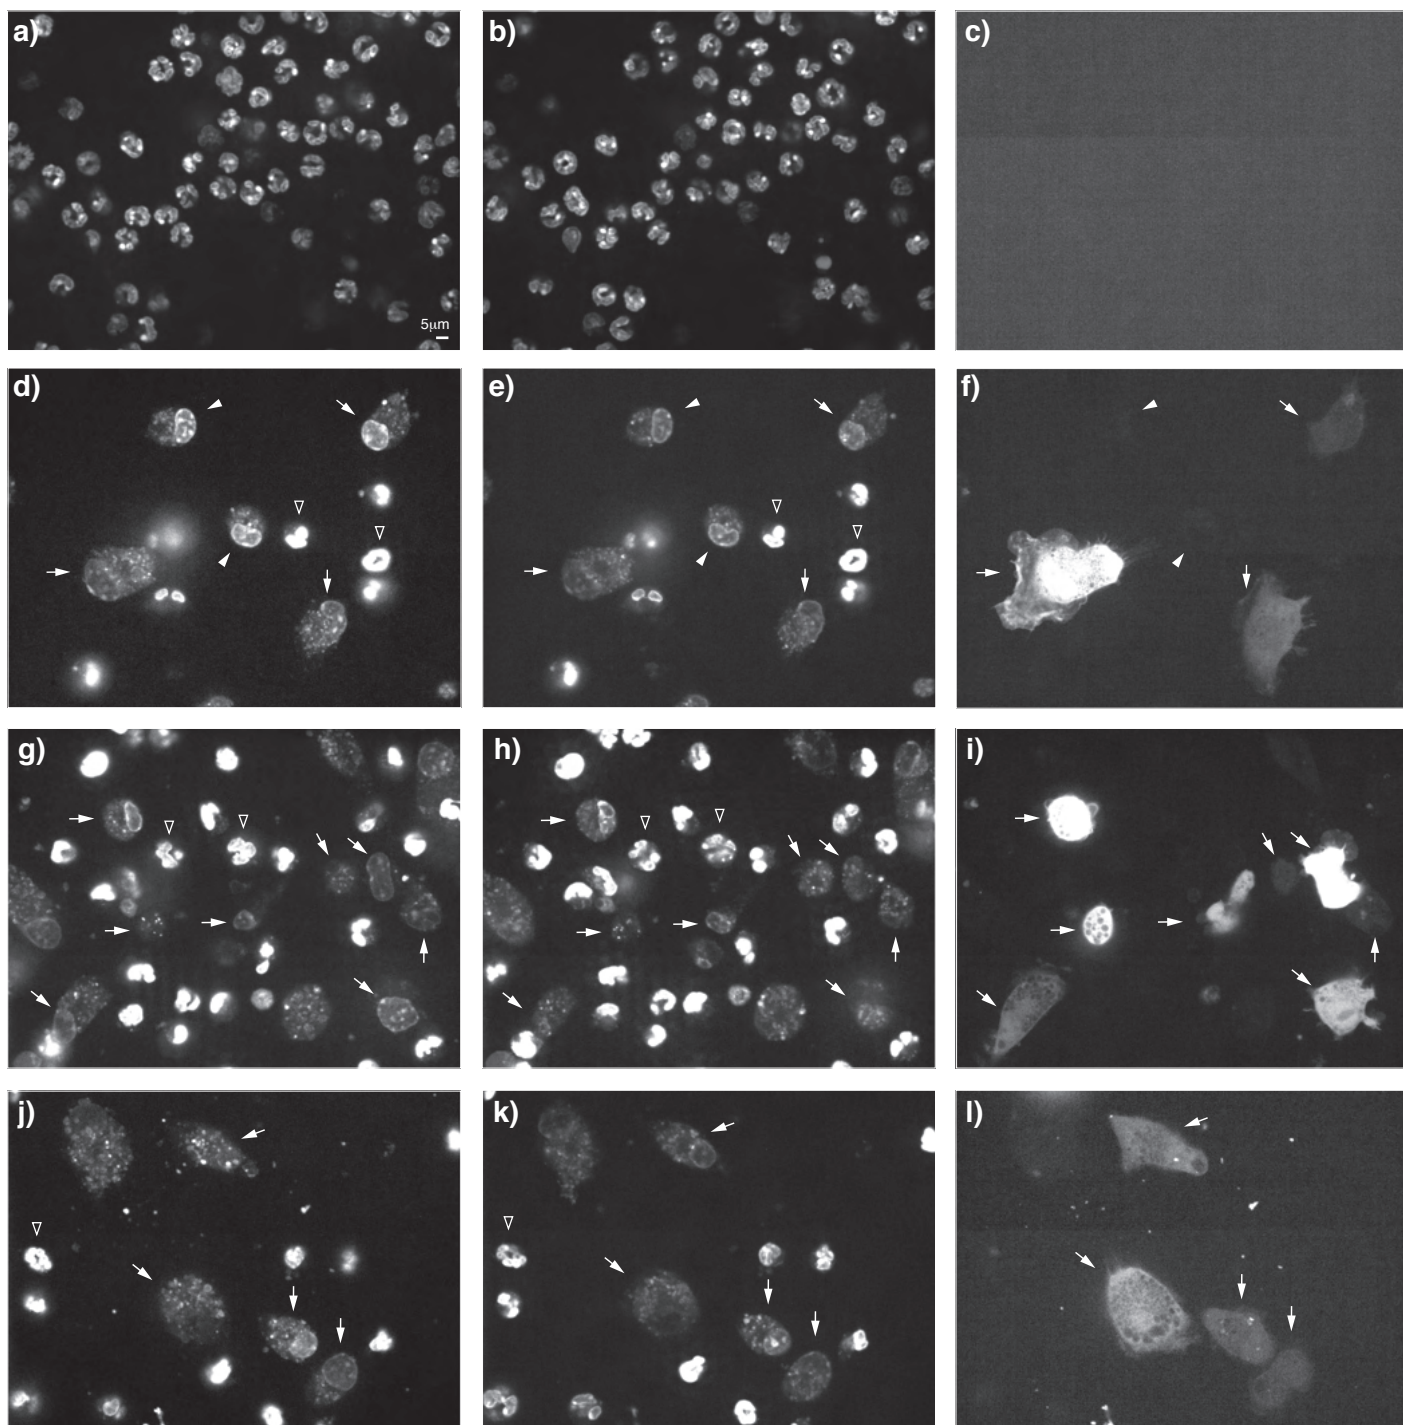

**Supplementary Figure 2 (associated with Figure 1). Confocal imaging of SLE-immune complex induced neutrophil to nAPC con-version.** Representative montages of CD11c-YFP reporter mouse blood neutrophils, showing YFP (c, f, i, l) and Cy5 fluorescence channels (a-b, d-e, g-h, j-k) at two different z-stacks to delineate nuclear morphology. Open head arrows indicate unconverted neutrophils, closed arrows indicate YFP-positive cells with mononuclear-like nuclei. Closed arrowheads in d-f indicate additional mononuclear cells with low CD11c-YFP signal. Subpanels (a-f) are replicates of Figure 1 with additional z-stacks for Cy5 at day 0 (a-b) and day 3 (d-e). Sub-panels (g-l) are day 3 images from an independent sample. All images are the same magnification. Scale bar (a) = 5 μm.



# Supplementary Figure 3

a

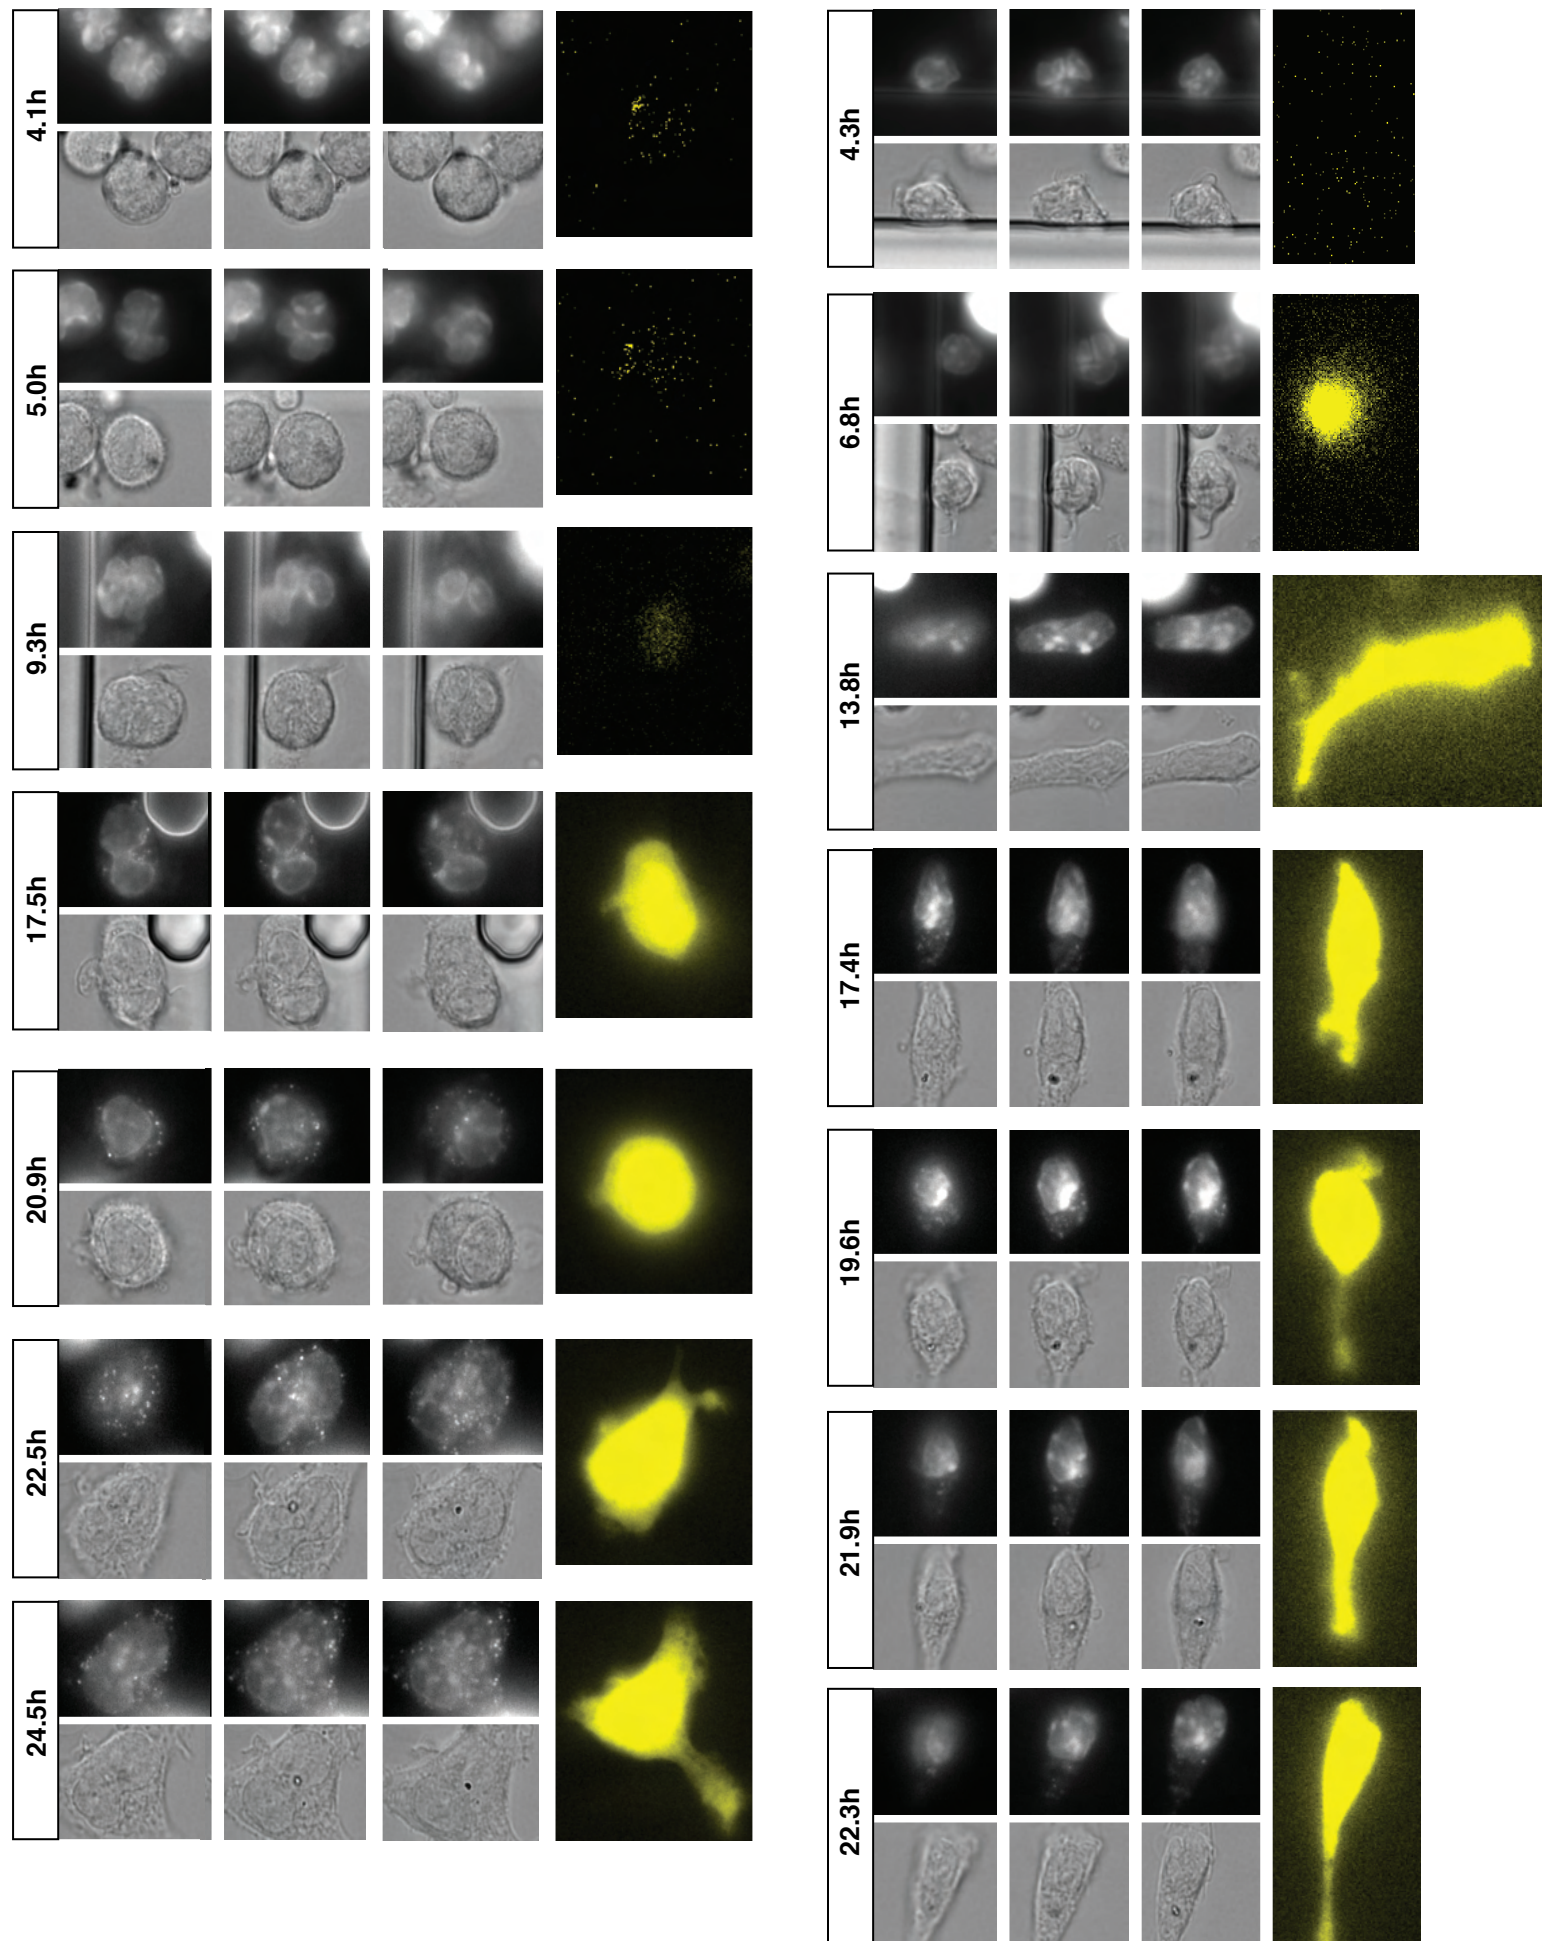

Supplementary Figure 3 cont'd

b

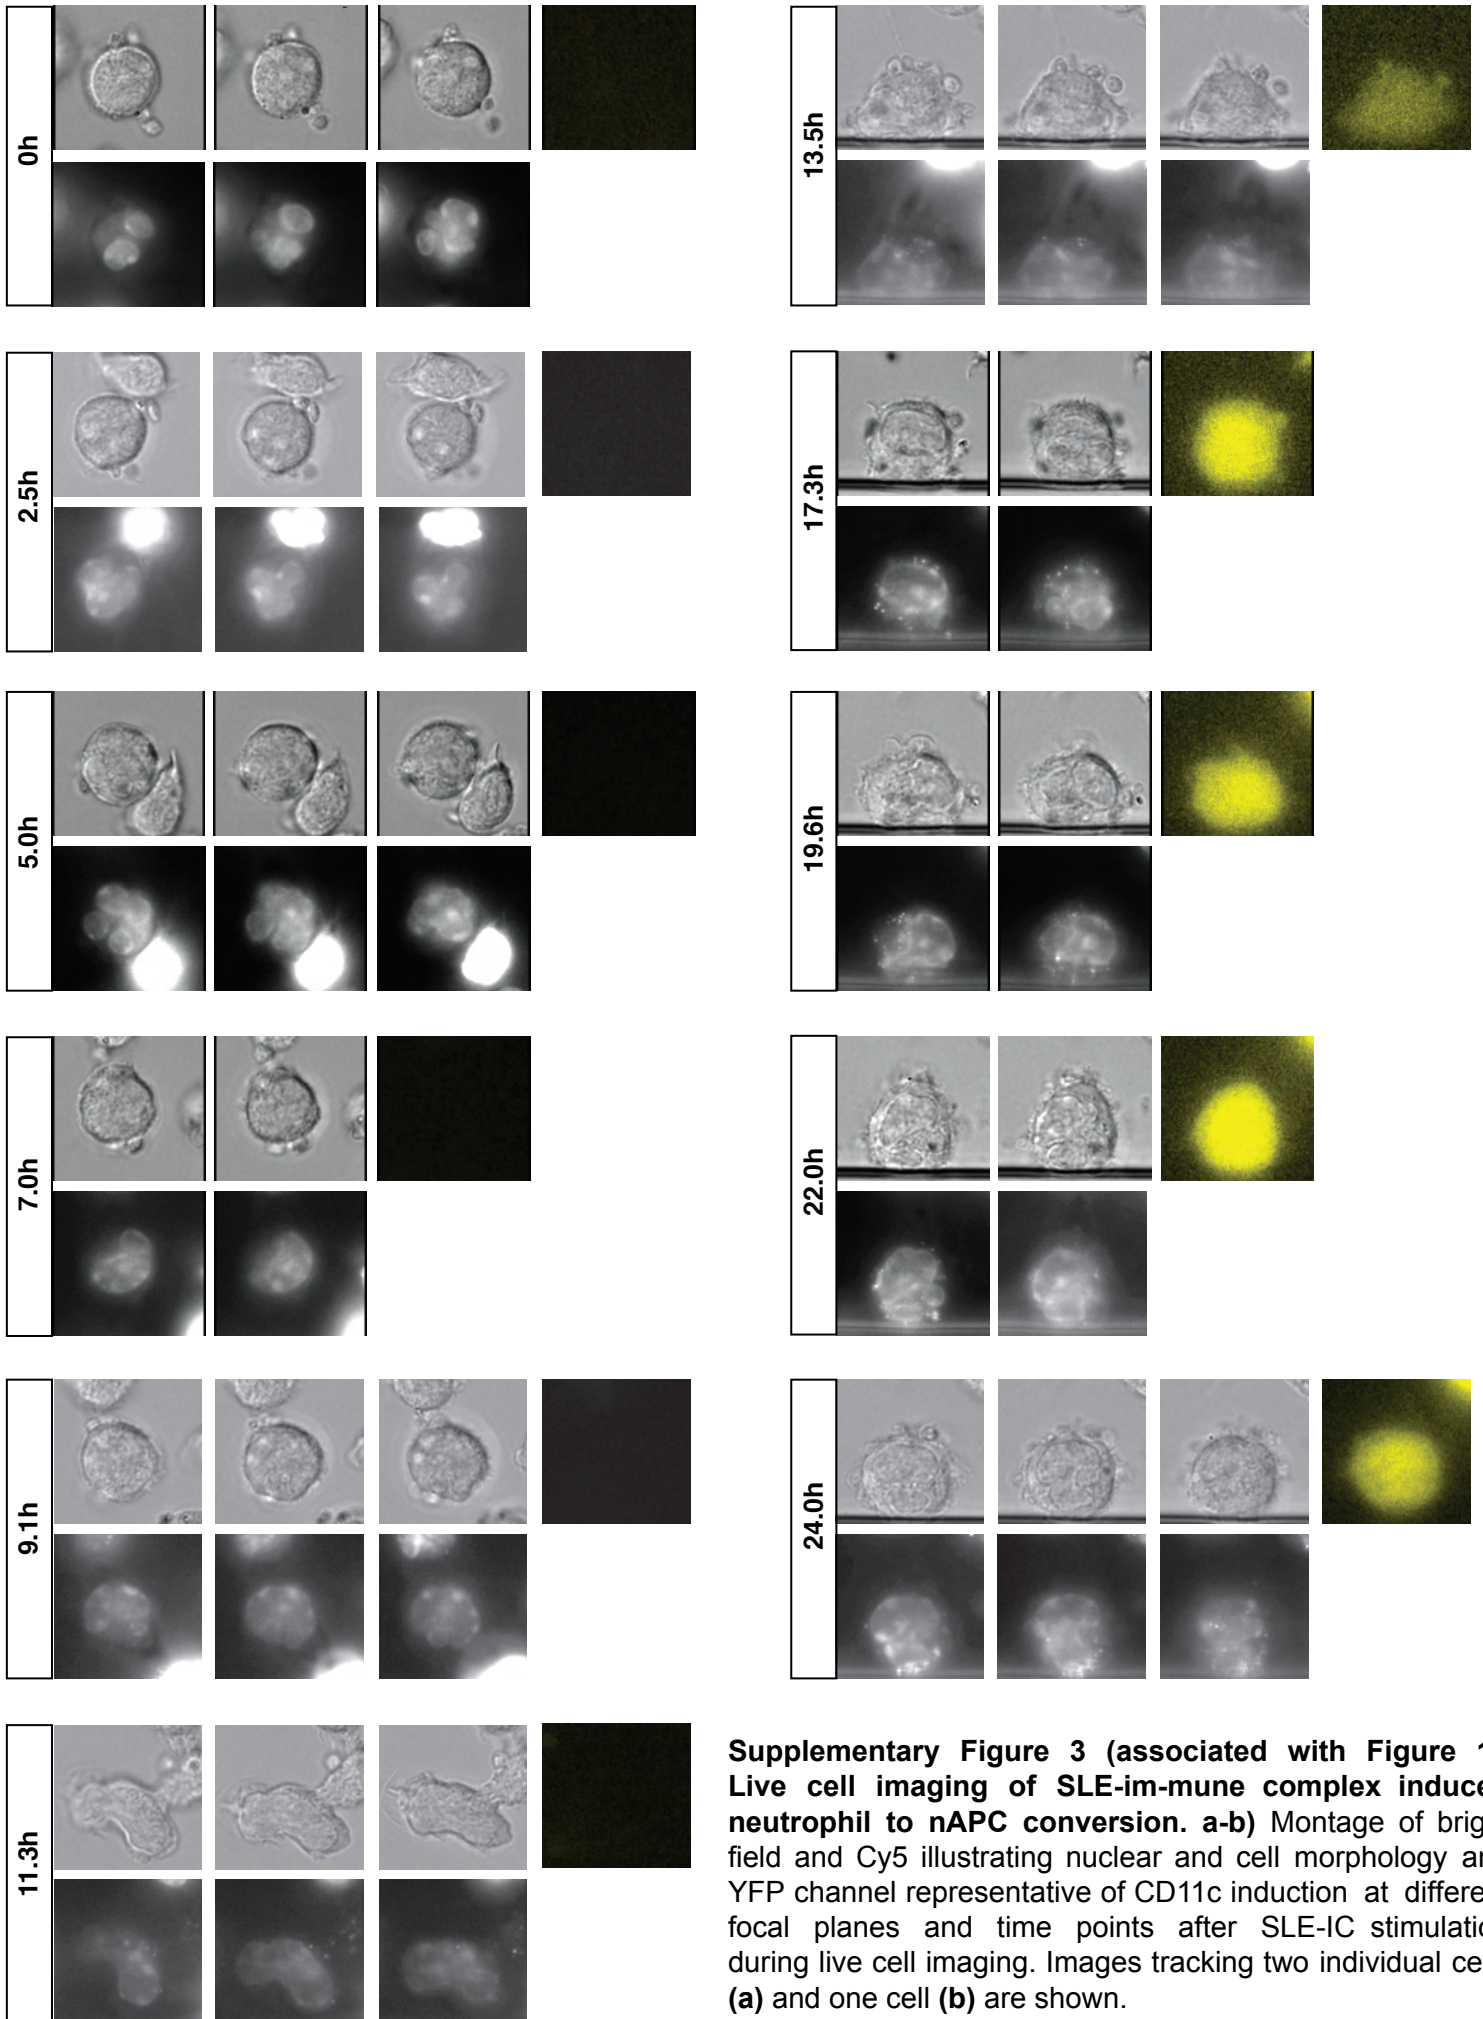

**Supplementary Figure 3 (associated with Figure 1). Live cell imaging of SLE-im-mune complex induced neutrophil to nAPC conversion. a-b) Montage of bright field and Cy5 illustrating nuclear and cell morphology and YFP channel representative of CD11c induction at different focal planes and time points after SLE-IC stimulation during live cell imaging. Images tracking two individual cells (a) and one cell (b) are shown.**



## Supplementary Figure 4

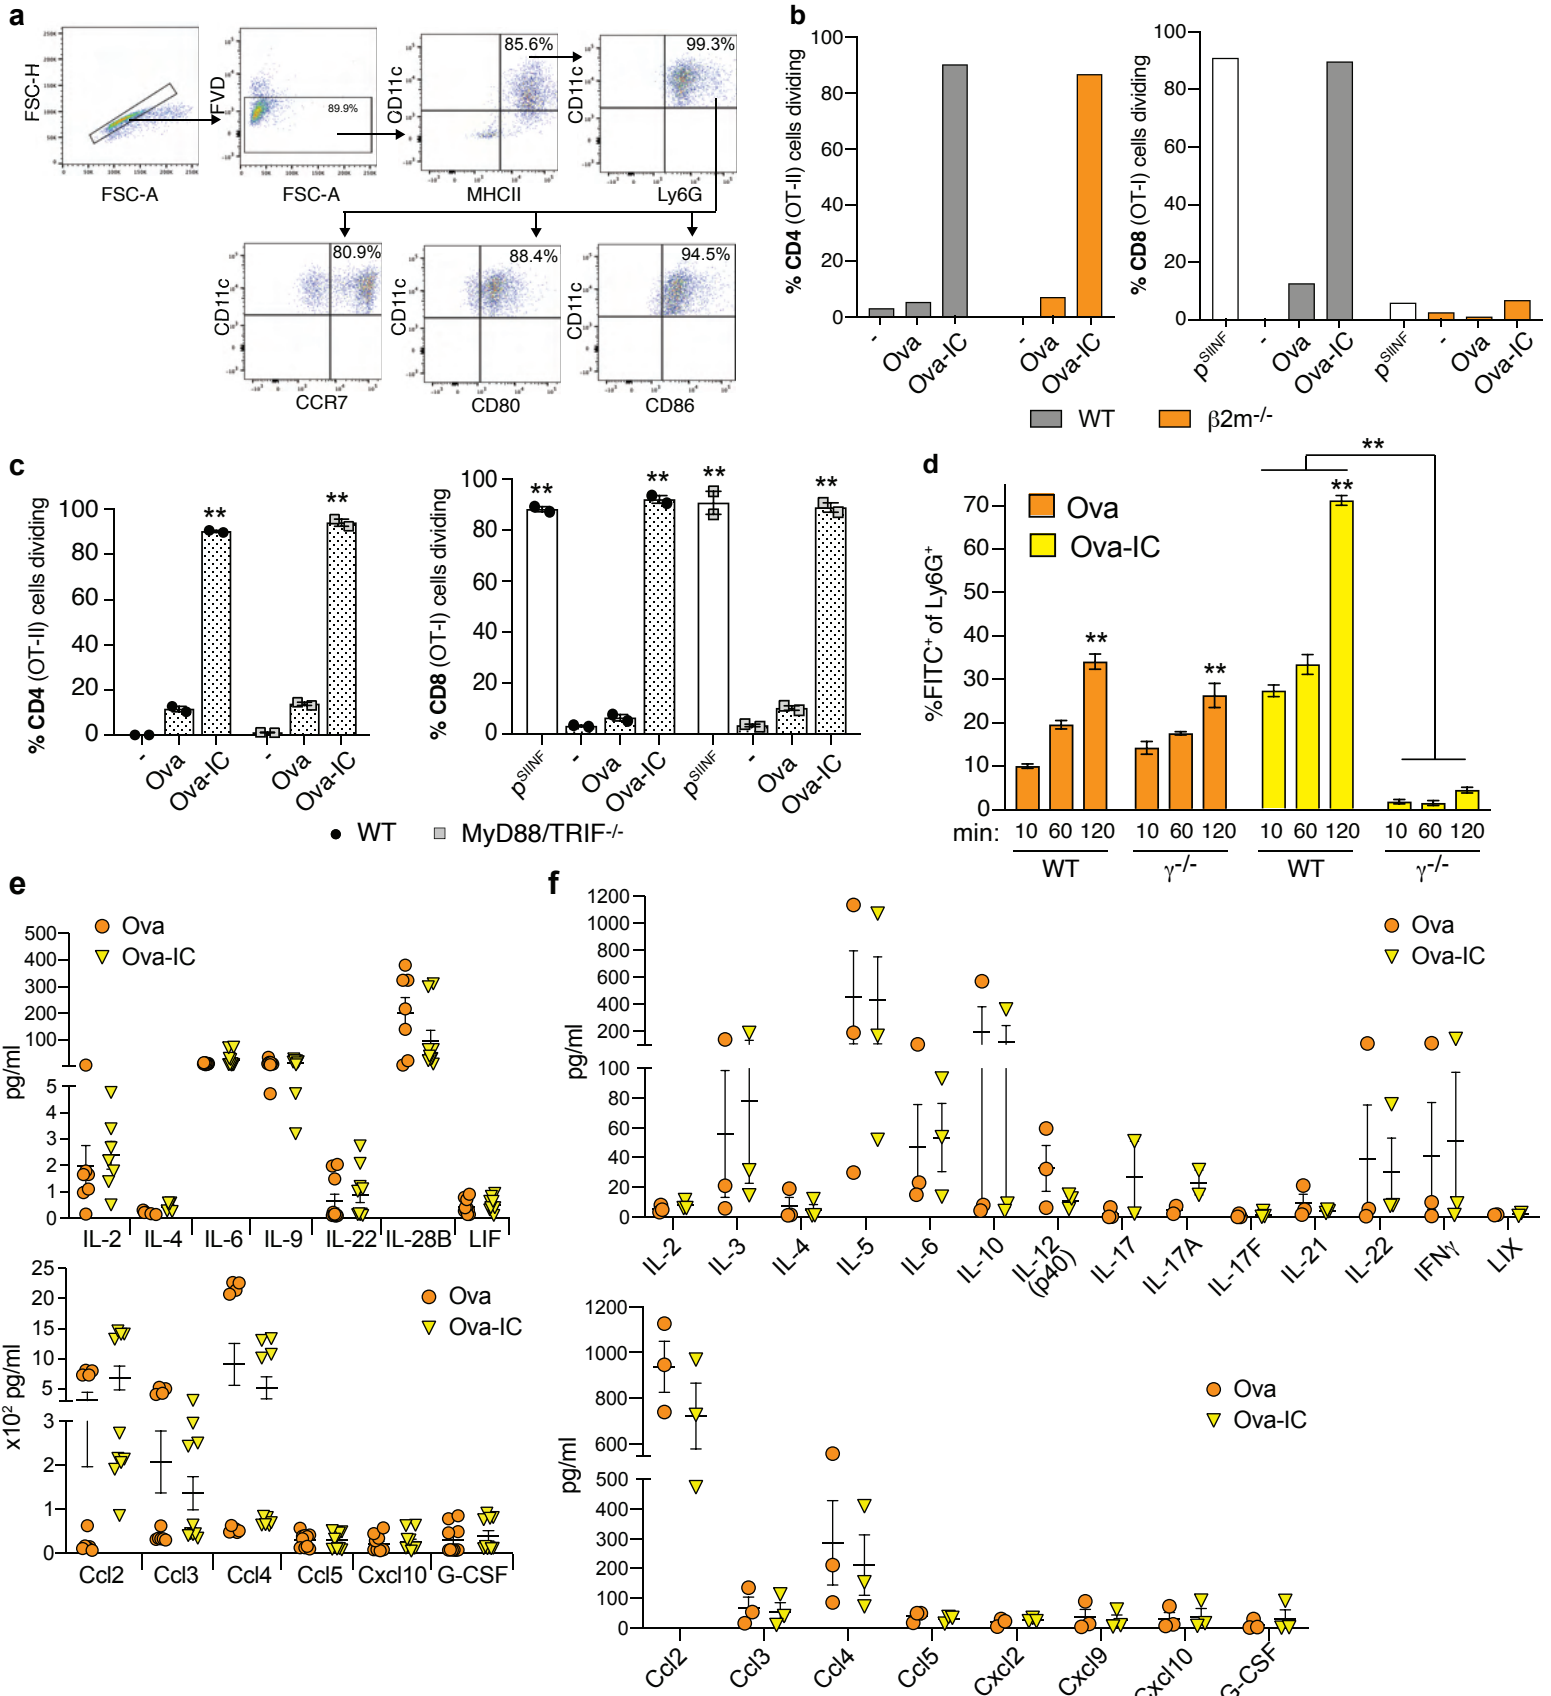

**Supplementary Figure 4 (associated with Figure 2). Analysis of T cell proliferation, antigen uptake and APC secreted cytokines. a)** Gating strategy for assessing adherent nAPCs from bone marrow neutrophils treated with Ova-IC for CD11c<sup>+</sup>MHCII<sup>+</sup> of Ly6G<sup>+</sup> cells and CD80, CD86 and CCR7. **b)** Percent proliferation of Cell Trace Violet labelled CD4<sup>+</sup>OT-II and CD8<sup>+</sup>OT-I T cells co-cultured with nAPCs derived from WT and  $\beta$ 2 microglobulin deficient (<sup>-/-</sup>) mice. As a positive control for OT-I proliferation, GM-CSF generated nAPC were pulsed with the Ova SIINFEKL peptide (p<sup>SINF</sup>). **c)** Cell Trace Violet labelled OT-II and OT-I T cells were cultured with Ova or Ova-IC generated nAPCs from WT and MyD88<sup>-/-</sup>TRIF<sup>-/-</sup> neutrophils and percent proliferation was calculated. **d)** Percent FITC positive WT and  $\gamma$ <sup>-/-</sup> neutrophils incubated with FITC-Ova or FITC-Ova-IC at indicated times are shown. **e)** Graphs showing the comparable amounts/levels of indicated cytokines in supernatant of Ova-nAPCs and Ova-IC-nAPCs as determined by ELISA. **f)** Cytokine profiles in supernatants of splenic cDCs treated with Ova or Ova-IC. Data is mean  $\pm$  s.e.m. Significance was determined as follows: c, d) one-way ANOVA and Dunnett's multiple comparison test. \*P<0.05 and \*\*P<0.005.

## Supplementary Figure 5

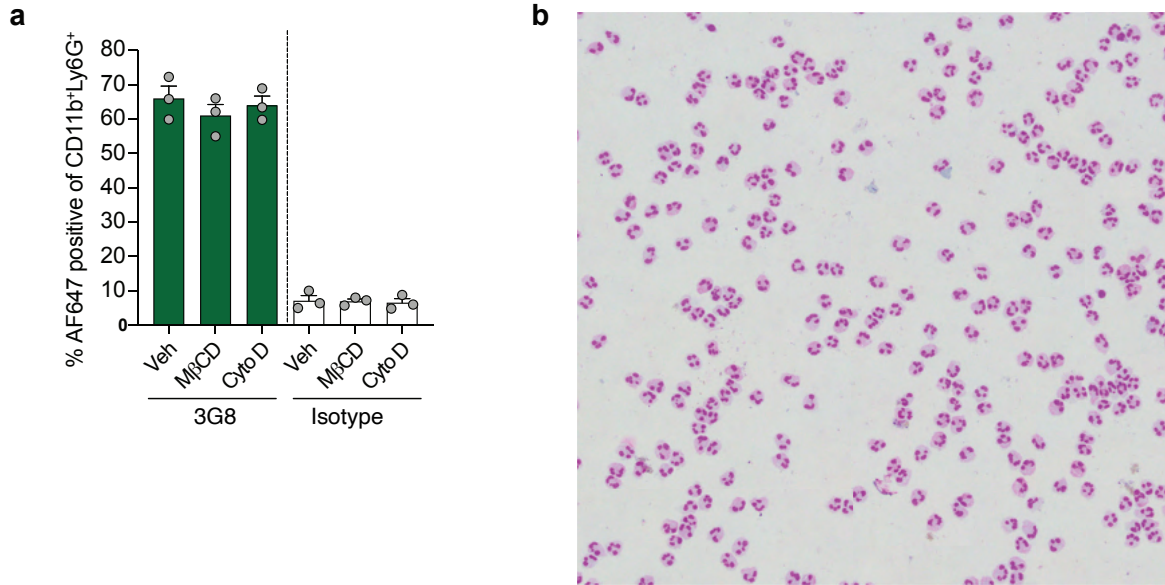

**Supplementary Figure 5 (associated with Figure 5). Controls for endocytosis assays and purity of human neutrophils on cyto-spins. a)** Isolated 3B/ $\gamma^{-/-}$  neutrophils were treated with vehicle (Veh), Methyl Beta Cyclodextrin (M $\beta$ CD) or Cytochalasin D (Cyto D) for 30min at 37°C, incubated with Fc $\gamma$ RIIIB antibody (3G8) or isotype for 30min at 4°C and then with AF647 labelled anti-mouse secondary to detect 3G8 or isotype (mouse antibodies) on the surface of Ly6G/CD11b. **b)** Representative Wright-Giemsa stained cytospin of neutrophils purified from normal human blood.



# Supplementary Figure 6

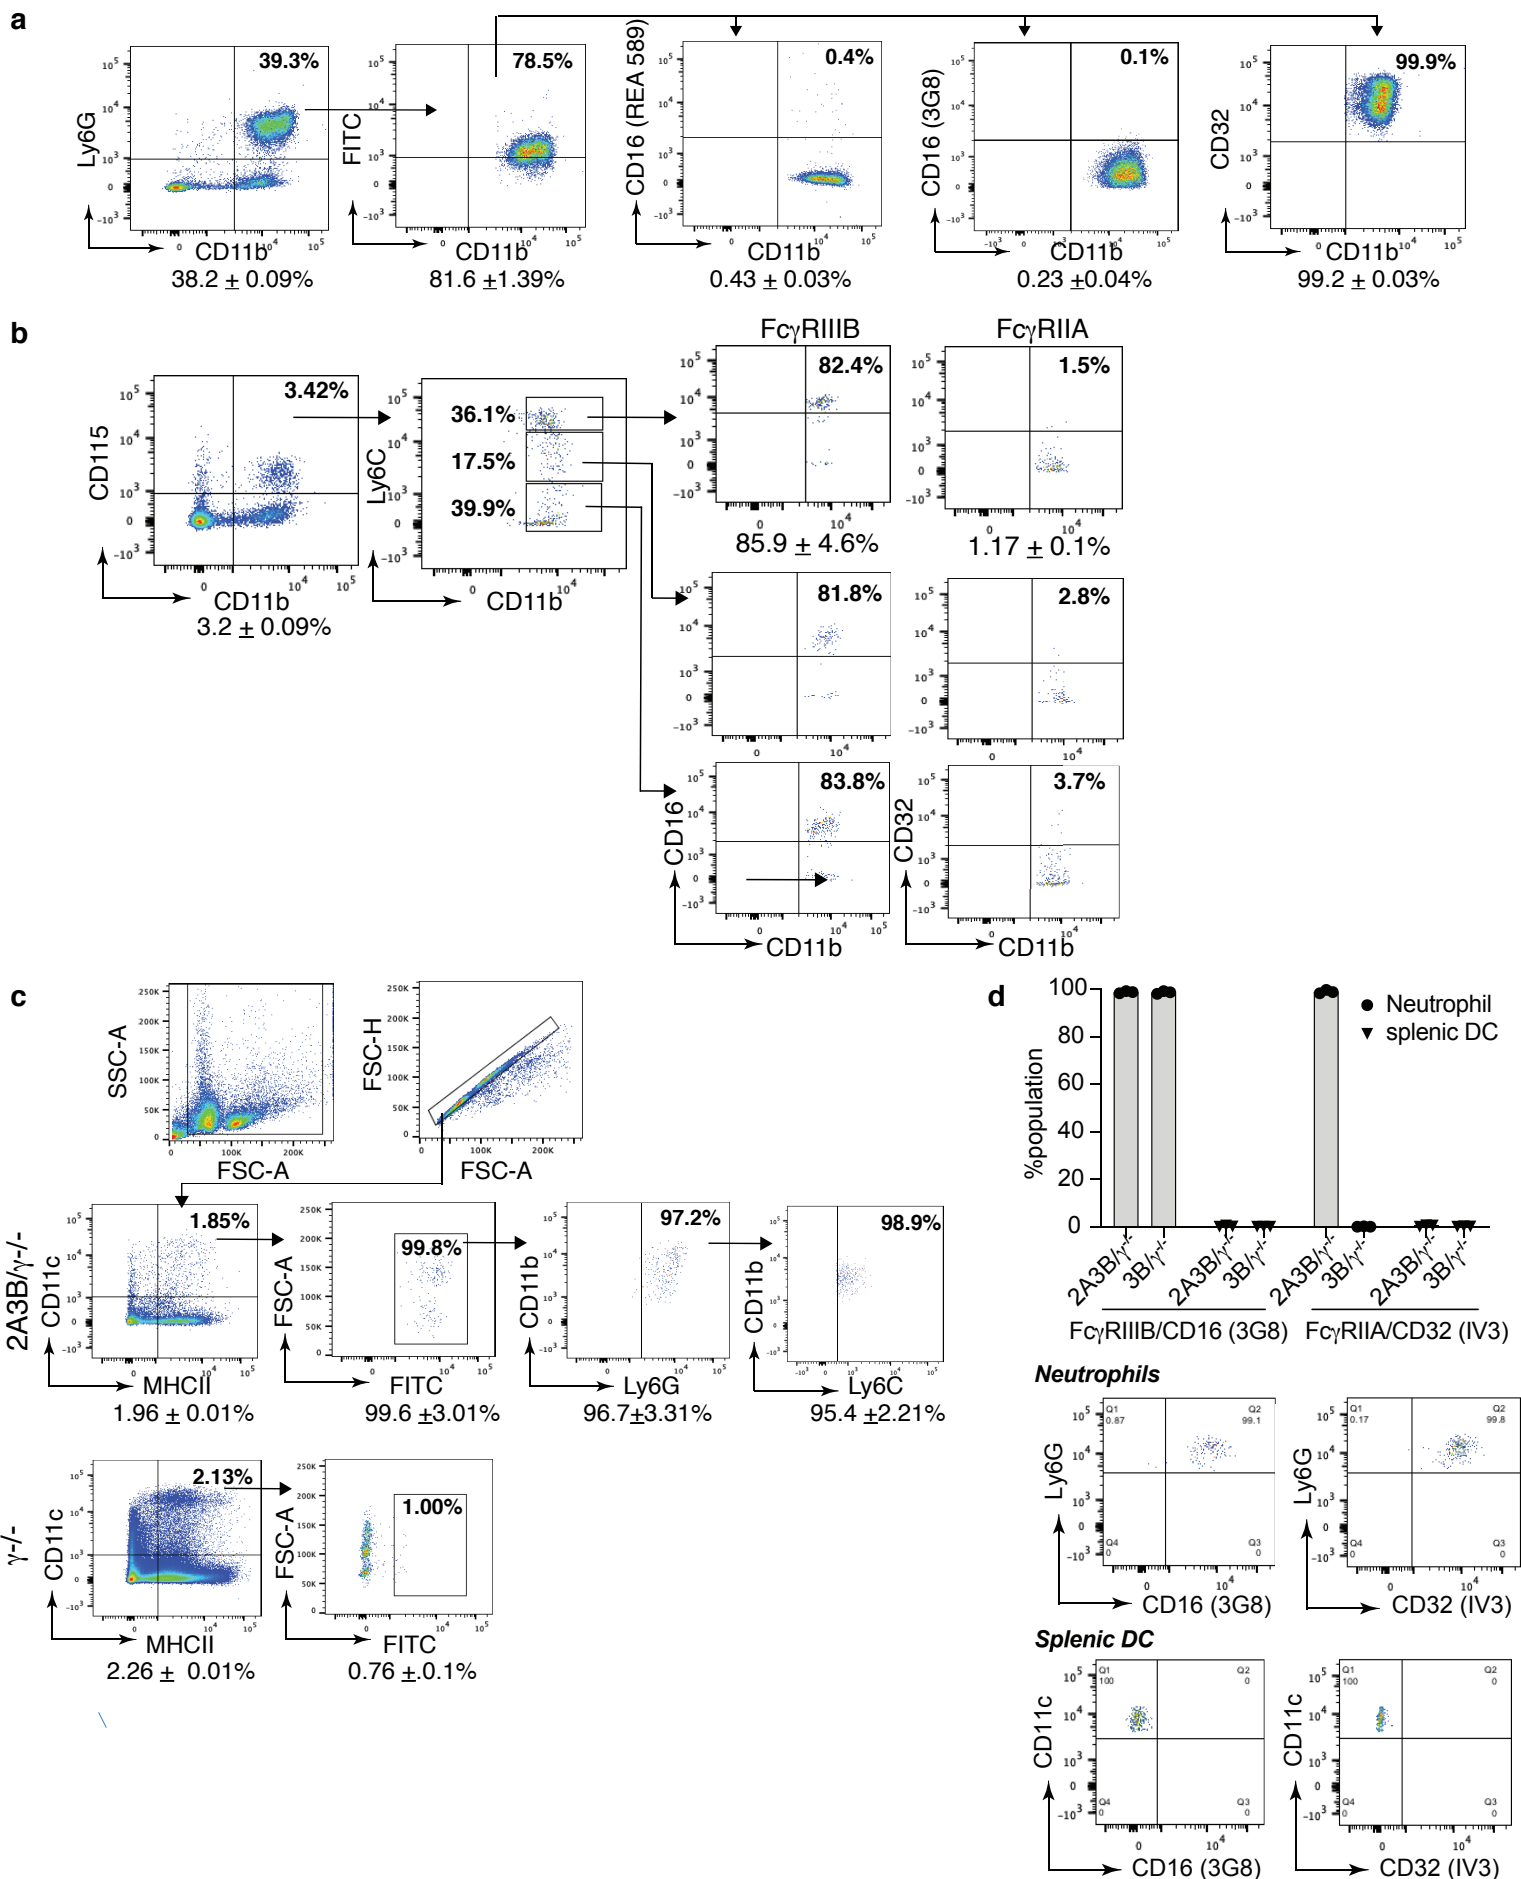

**Supplementary Figure 6 (associated with Figure 6). Analysis of human FcγR expression and internalization in FcγR humanized mice. a) Flow plots of surface FcγRIIIB (CD16) and FcγRIIA (CD32) 3.5hrs after i.v. injection of 3G8-fOva conjugate in whole blood. b) Gating strategy for assessing FcγRIIIB (CD16) and FcγRIIA (CD32) expression on CD115<sup>+</sup> and Ly6C<sup>hi</sup> cells in 2A3B/γ<sup>-/-</sup> mice. c) FACS plots of FITC-positive events in CD11c<sup>+</sup>MHCII<sup>+</sup> nAPCs in spleen of 2A3B/γ<sup>-/-</sup> and γ<sup>-/-</sup> mice 72hrs after 3G8-fOva conjugate injection. d) BMNs and splenic cDCs from 2A3B/γ<sup>-/-</sup> and 3B/γ<sup>-/-</sup> mice were analyzed for FcγRIIIB (CD16) and FcγRIIA (CD32) using antibodies 3G8 and IV.3, respectively (upper panel). FACS profile for the same are shown (lower panel).**

## Supplementary Figure 7

a

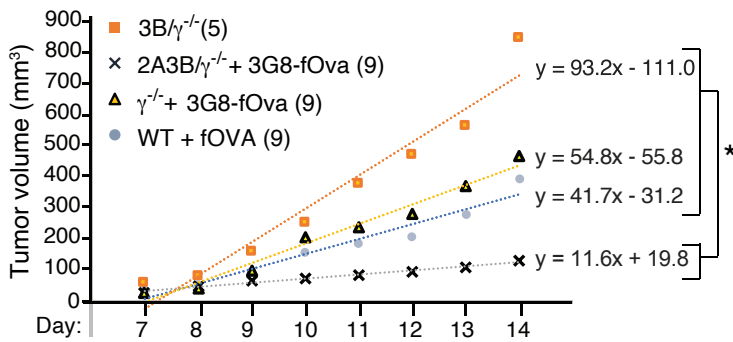

b

### CD8

|                                  | FVD        | CD3/CD8    | CD62L <sup>lo</sup> / CD44 <sup>hi</sup> | CD62L <sup>lo</sup> / CD44 <sup>hi</sup> /Tet <sup>+</sup> | CD62L <sup>lo</sup> /CD44 <sup>hi</sup> /PD1 <sup>+</sup> |
|----------------------------------|------------|------------|------------------------------------------|------------------------------------------------------------|-----------------------------------------------------------|
| fOva                             | 75.74±2.26 | 13.83±0.45 | 28.62±6.72                               | 0.61±0.07                                                  | 0.62±0.15                                                 |
| 2A3B/γ <sup>-/-</sup> + 3G8-fOva | 81.78±1.08 | 12.65±0.80 | 28.14±5.88                               | 3.28±1.11*                                                 | 1.23±0.31                                                 |
| γ <sup>-/-</sup> + 3G8-fOva      | 77.08±1.81 | 12.91±0.54 | 27.82±5.61                               | 0.42±0.10                                                  | 0.79±0.20                                                 |

### CD4

|                                  | FVD        | CD3/CD4    | CD4/CD25  | CD4/CD69  | CD4/Foxp3 <sup>+</sup> | CD4/Ki67 <sup>+</sup> | CD4/Tbet <sup>+</sup> |
|----------------------------------|------------|------------|-----------|-----------|------------------------|-----------------------|-----------------------|
| fOVA                             | 80.94±4.33 | 17.28±1.08 | 0.48±0.11 | 0.26±0.06 | 6.31±2.64              | 13.39±1.87            | 5.97±0.69             |
| 2A3B/γ <sup>-/-</sup> + 3G8-fOVA | 85.31±2.34 | 19.66±0.42 | 1.30±0.19 | 0.34±0.1  | 8.19±2.93              | 18.56±1.4             | 5.10±0.49             |
| γ <sup>-/-</sup> + 3G8-fOVA      | 81.52±3.73 | 18.20±1.28 | 1.11±0.17 | 0.33±0.09 | 4.56±1.38              | 16.71±1.57            | 4.17±1.07             |

### Ratio

|                                  | CD8 <sup>+</sup> /Treg <sup>+</sup> | CD8Tet <sup>+</sup> /Treg <sup>+</sup> | CD4 Teff <sup>+</sup> /Treg <sup>+</sup> |
|----------------------------------|-------------------------------------|----------------------------------------|------------------------------------------|
| fOVA                             | 6.69±1.63                           | 0.32±0.09                              | 0.83±0.43                                |
| 2A3B/γ <sup>-/-</sup> + 3G8-fOva | 5.02±1.68                           | 0.92±0.30                              | 0.52±0.18                                |
| γ <sup>-/-</sup> + 3G8-fOVA      | 9.01±3.06                           | 0.30±0.11                              | 0.68±0.27                                |

**Supplementary Figure 7 (associated with Figure 7). Regression analysis of tumor growth and T cell subset analysis in the B16F10-Ova model.** a) Regression analysis was used to compare slope curve coefficient (tumor growth rate) between the different groups. A Prism regression analysis was used and tested for whether slopes and inter-cepts differ. Overall comparison was done using a one-way ANOVA and Dunnett's multiple comparison. Trend-lines for tumor volume of all groups, created in Excel, are shown. b) Table of T cell subset analysis of spleens harvested from mice with transplanted B16F10-Ova cells. Spleens were analyzed for Ova-peptide specific effector CD8 T cells using MHC I-tetramers and markers for CD8 effector (CD62<sup>lo</sup>CD44<sup>hi</sup>), CD4 and Treg cells. Results for T cell activation markers (CD25, CD69) proliferation marker (Ki67), transcriptional regulators (T-bet) and PD1 are also shown. \*P<0.05 in 2A3B/γ<sup>-/-</sup>+3G8-fOva compared to other groups as analyzed by One-way ANOVA and Dunnett's multiple comparison test.

**Supplementary Figure 8**

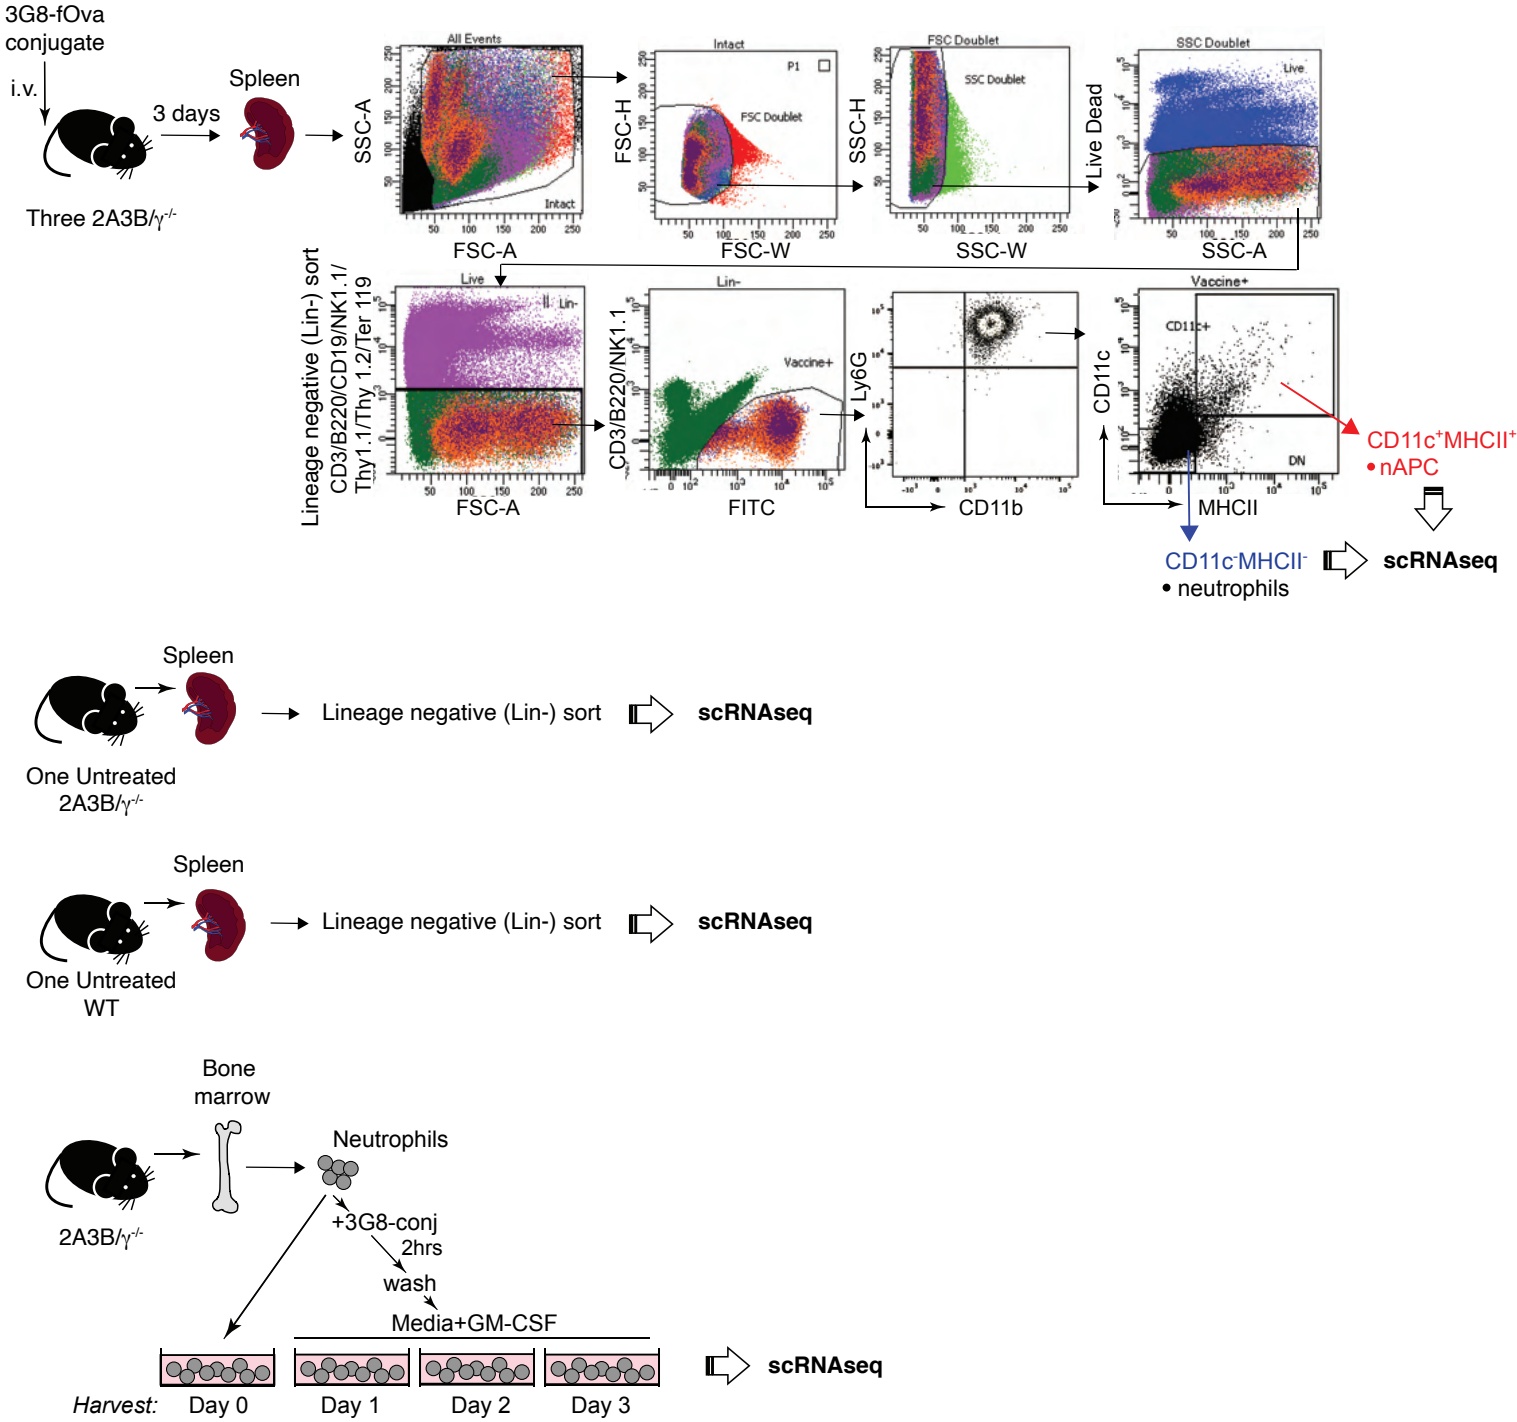

**Supplementary Figure 8 (associated with Figure 8). Schematic of study design and analysis of scRNAseq data.** Overview of scRNA-seq study design and flow cytometry profiles of sorted populations from spleen.

Supplementary Figure 9

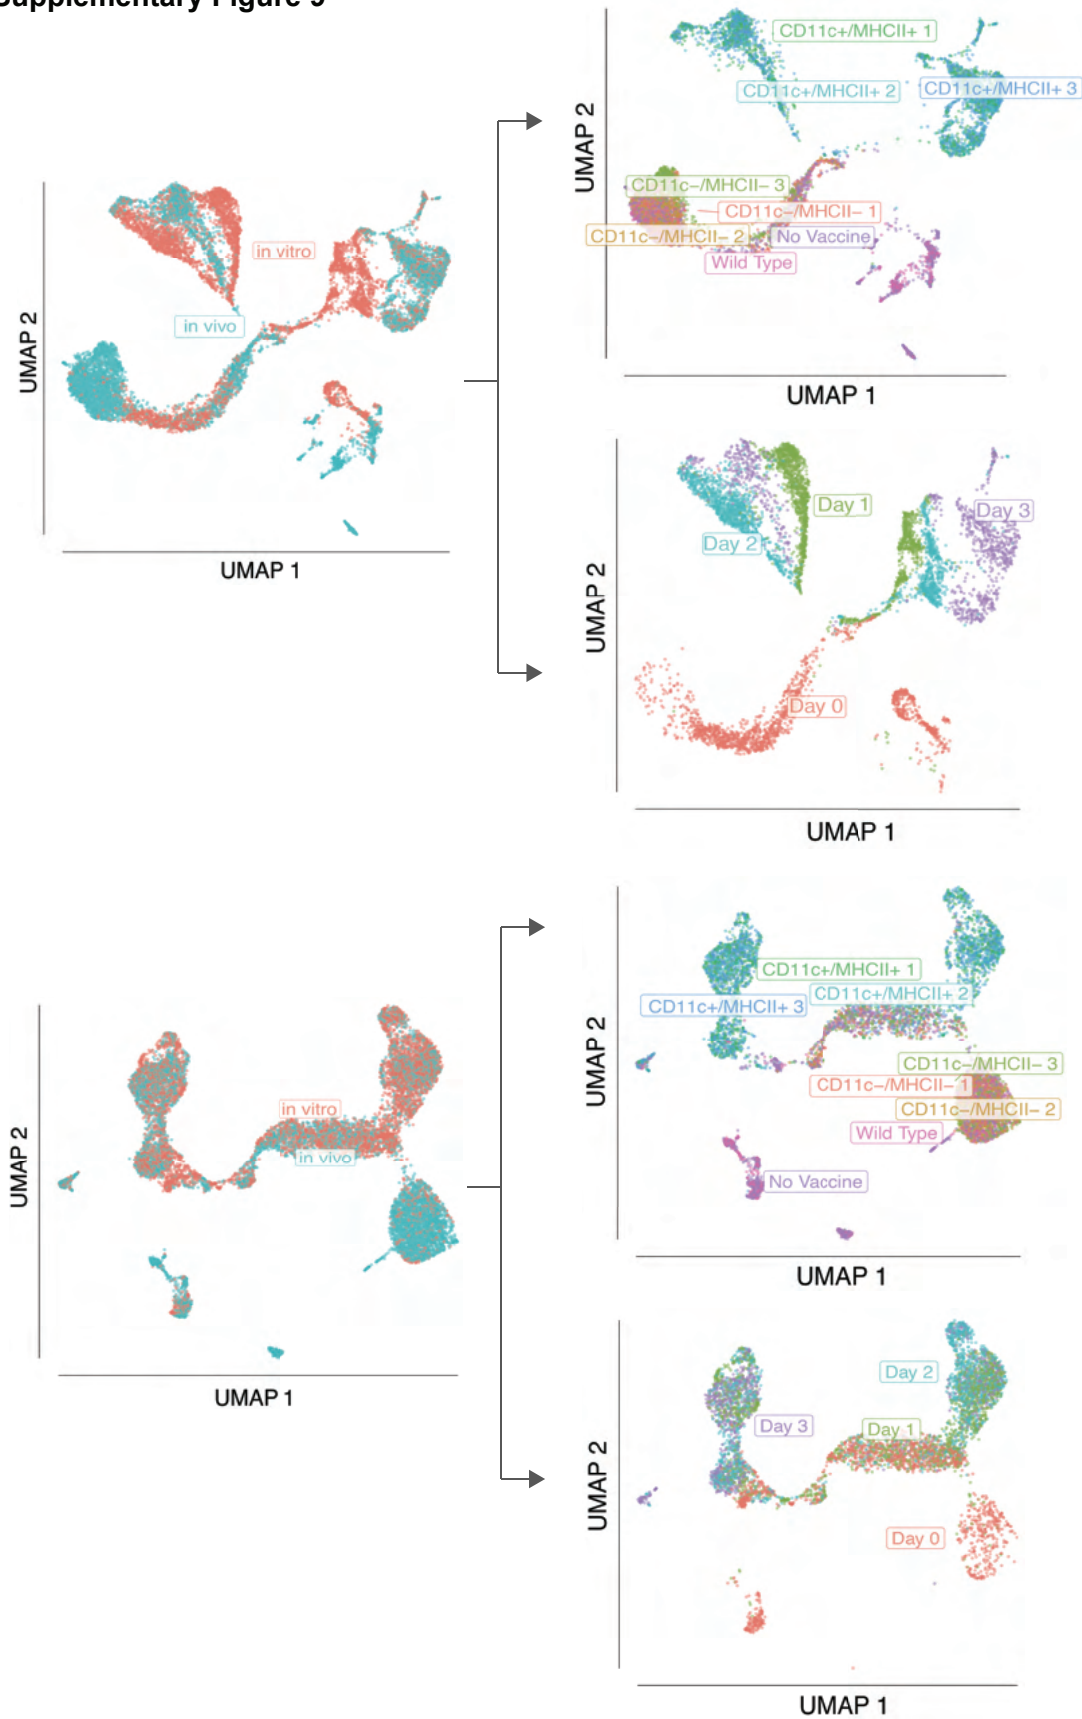

**Supplementary Figure 9 (associated with Figure 8). UMAP projection.** UMAP projection of data pre-harmonization, colored by in vitro and in vivo (top left) and separated in vivo and in vitro cells colored by hashtag population (top right). UMAP projection of data post-harmonization, colored by in vitro and in vivo (bottom left) and separated in vivo and in vitro cells colored by hashtag population (bottom right).



## Supplementary Figure 10

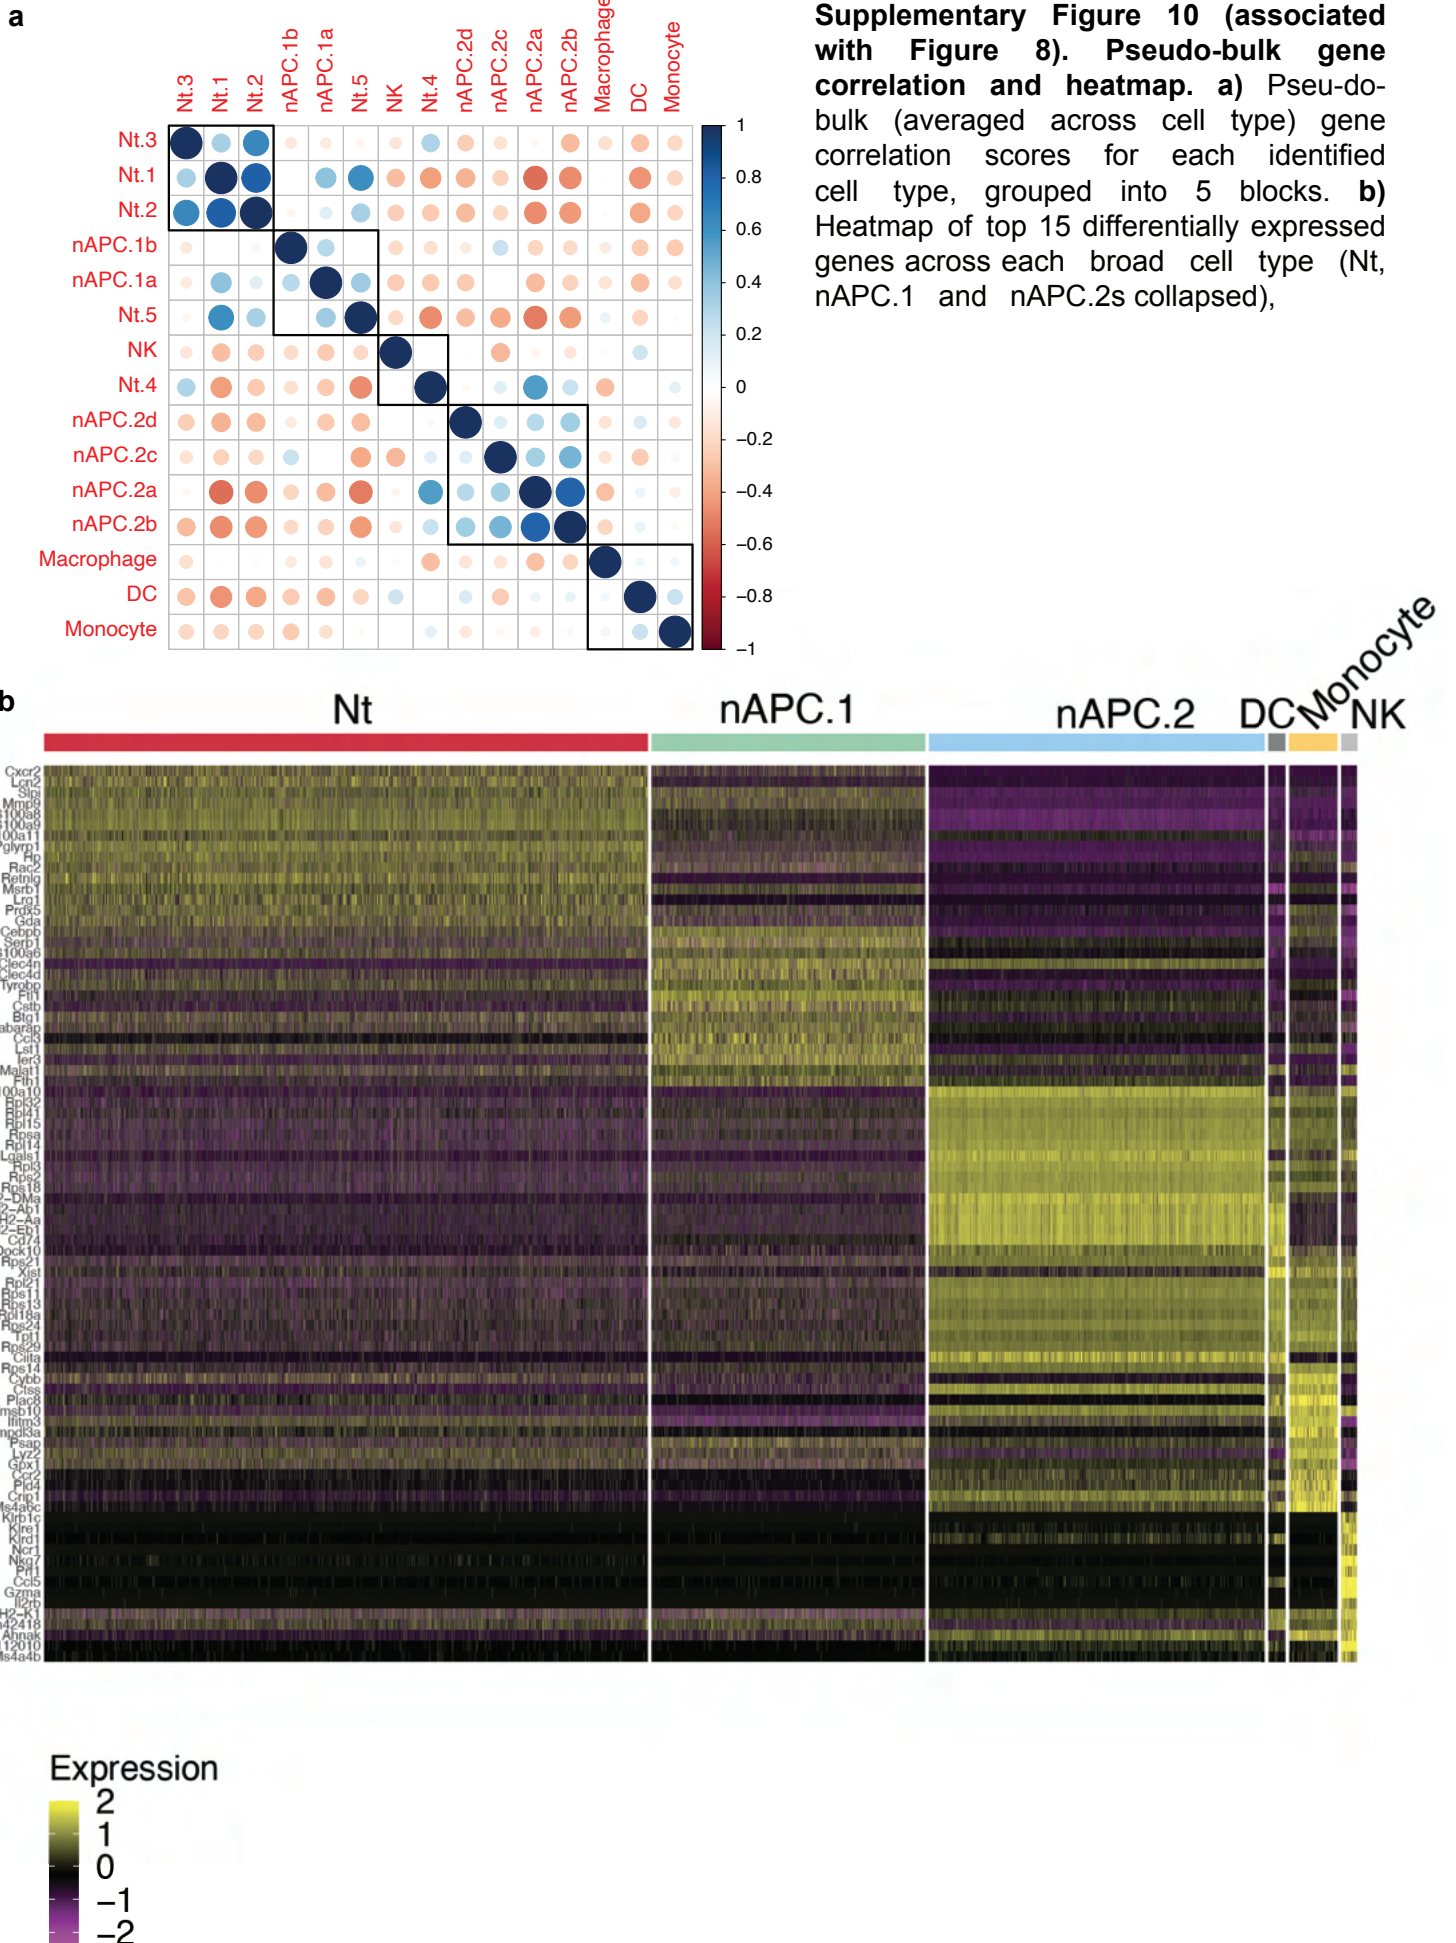

# Supplementary Figure 11

## Granule proteins

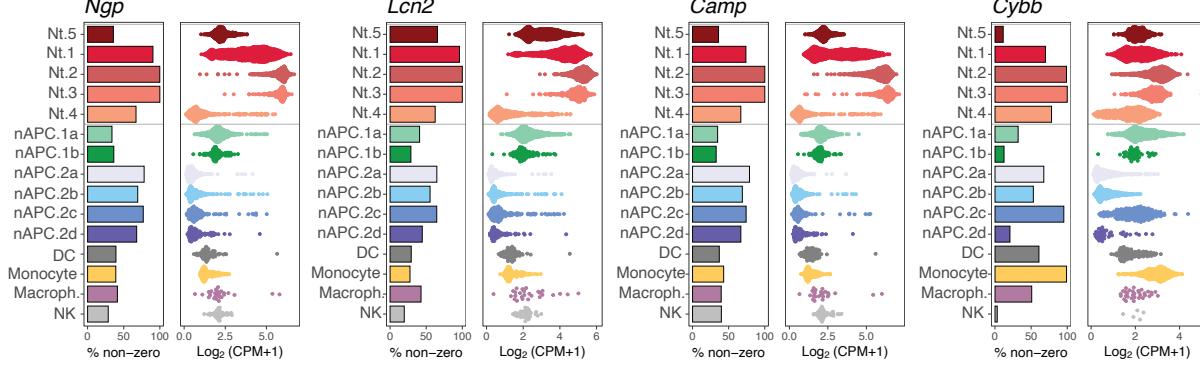

Supplementary Figure 11 (associated with Figure 8). Violin plots of genes. Violin plots of normalized expression of various genes in indicated categories across broad cell types.

## Antigen presentation

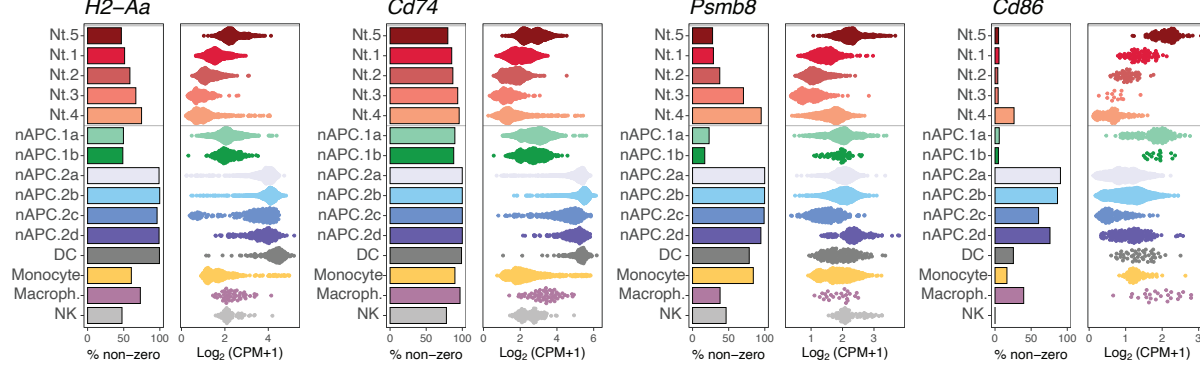

## Cytokines and chemokines

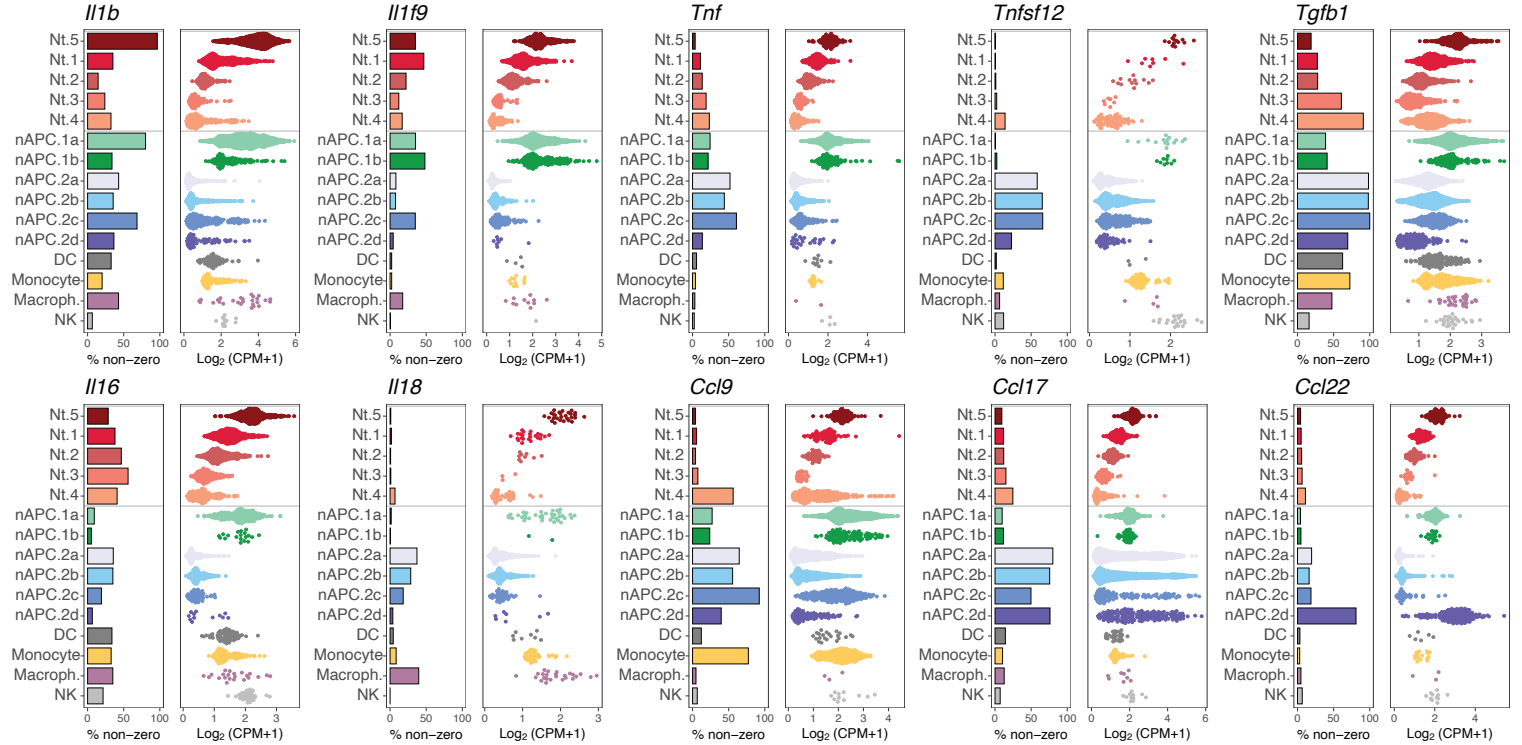

## Chemokine receptors

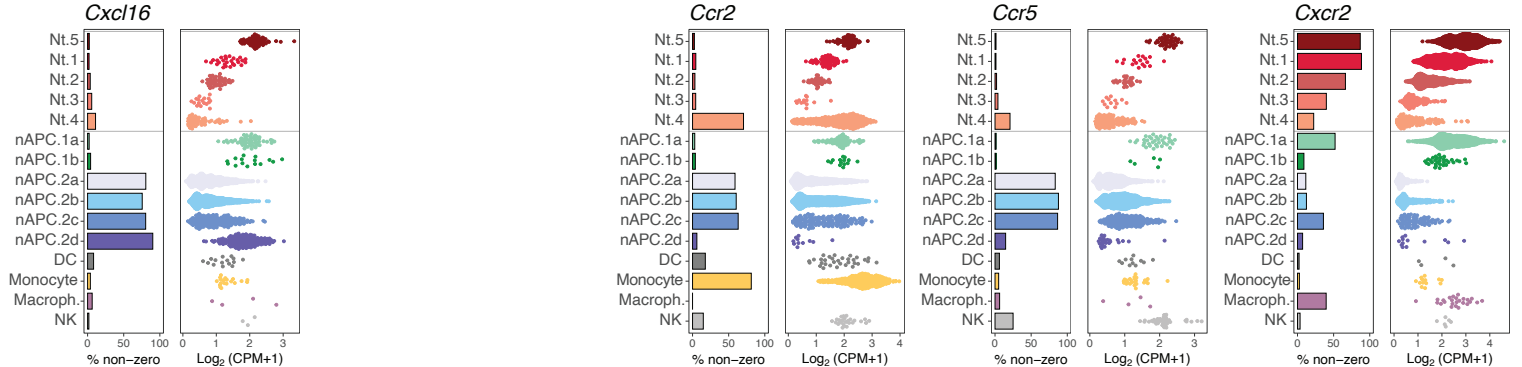

# Supplementary Figure 12

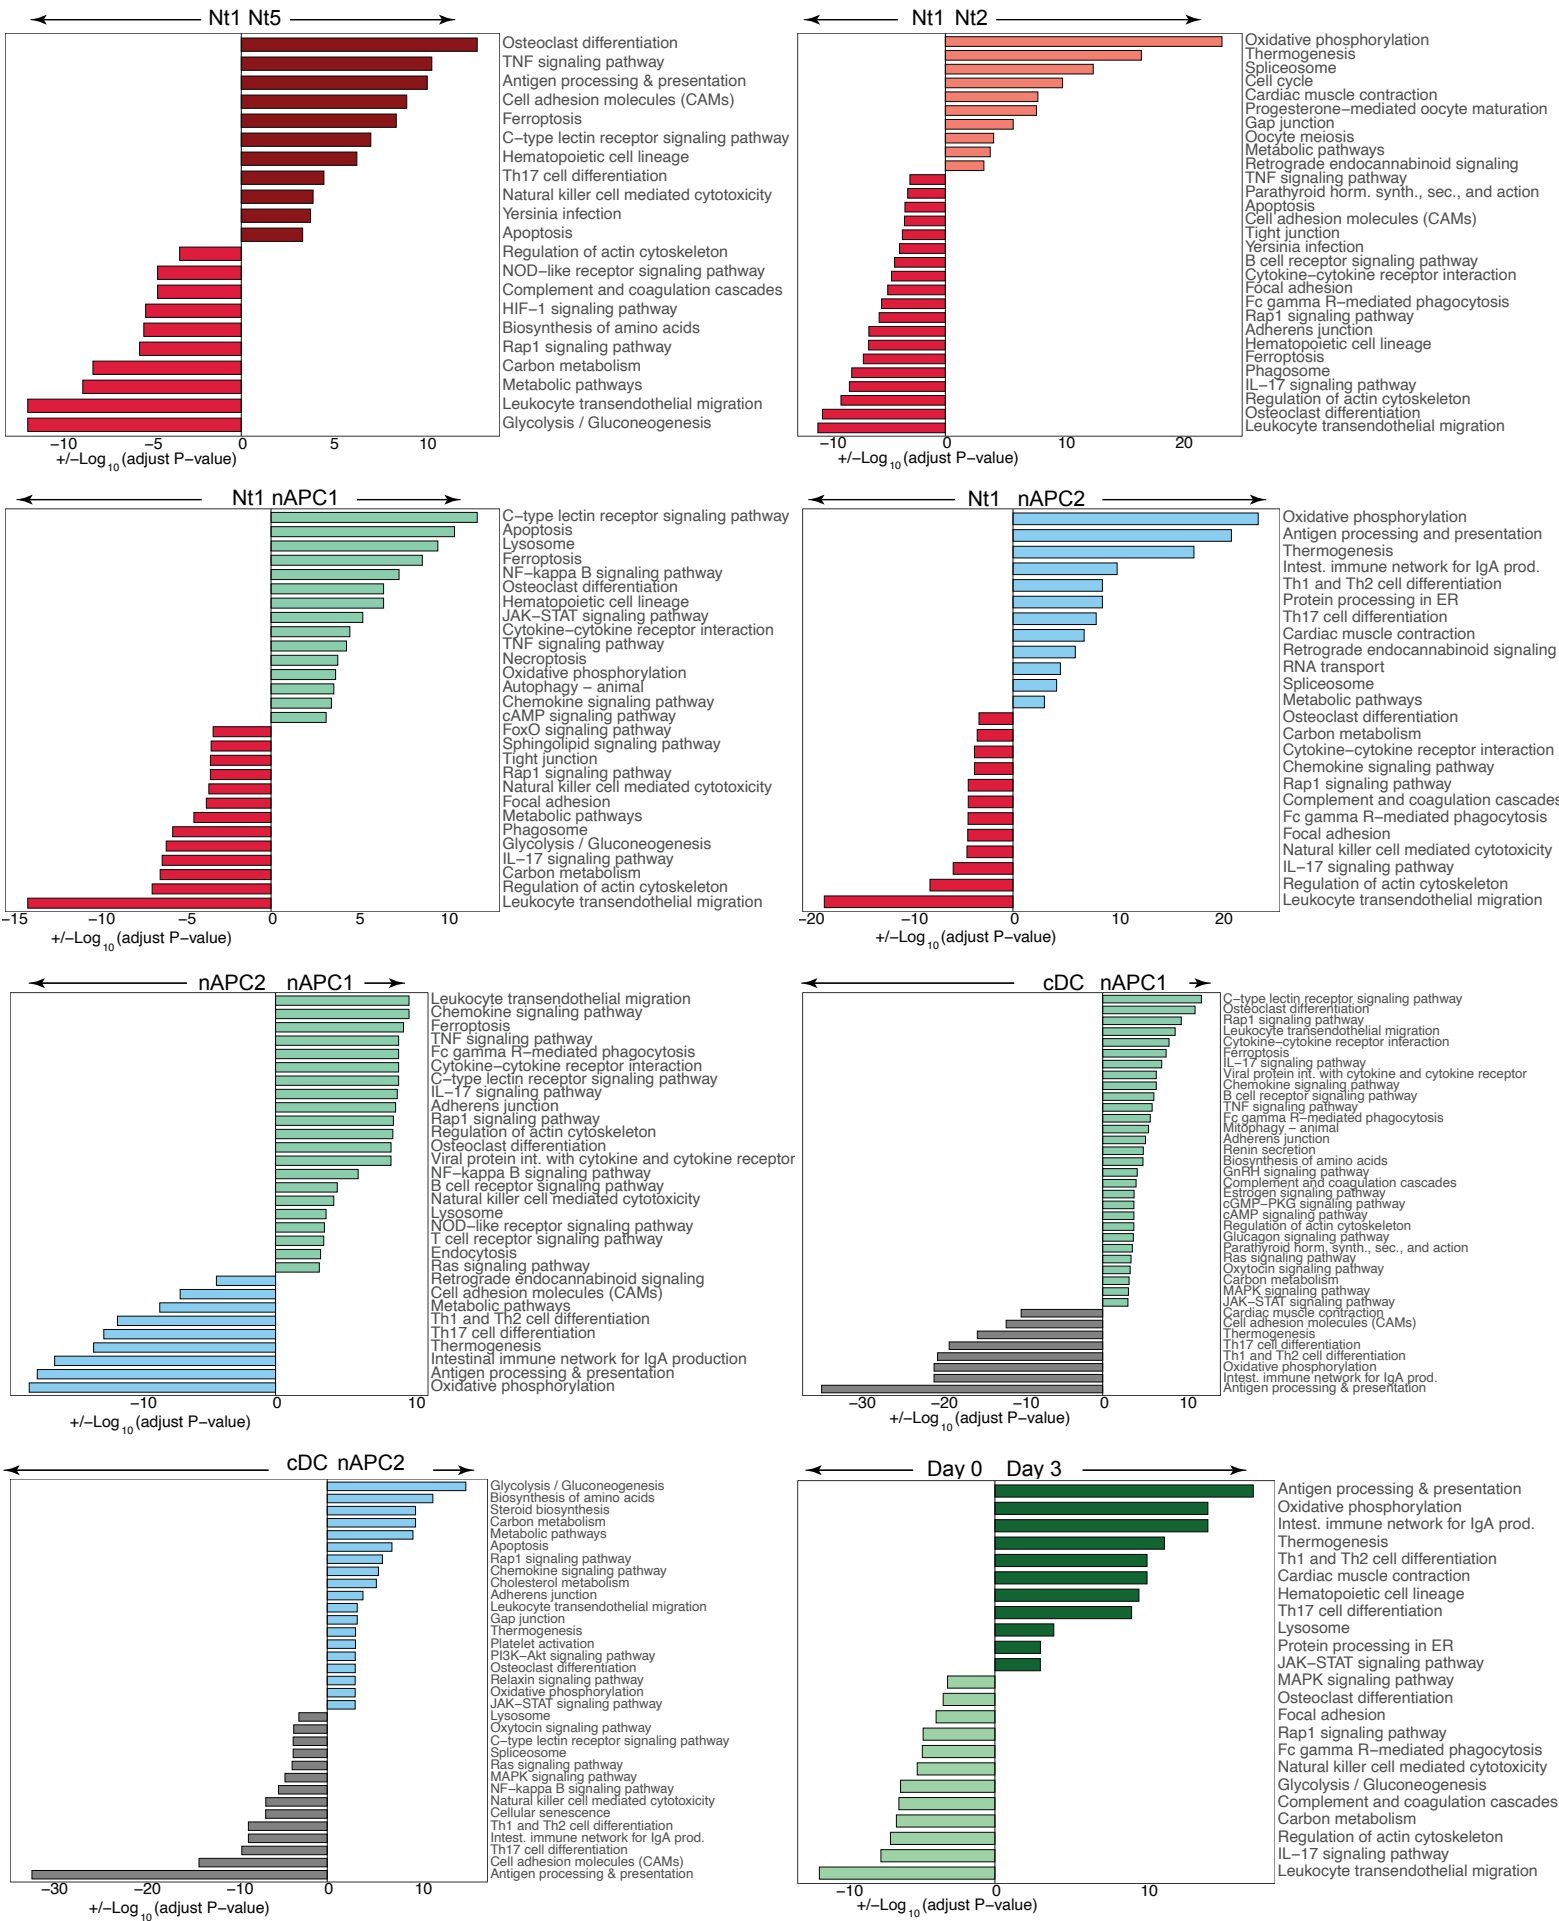

Supplementary Figure 12 (associated with Figure 8). KEGG pathway enrichment. KEGG pathway enrichment p-values for various cell type comparisons.

# Supplementary Figure 13

**a**

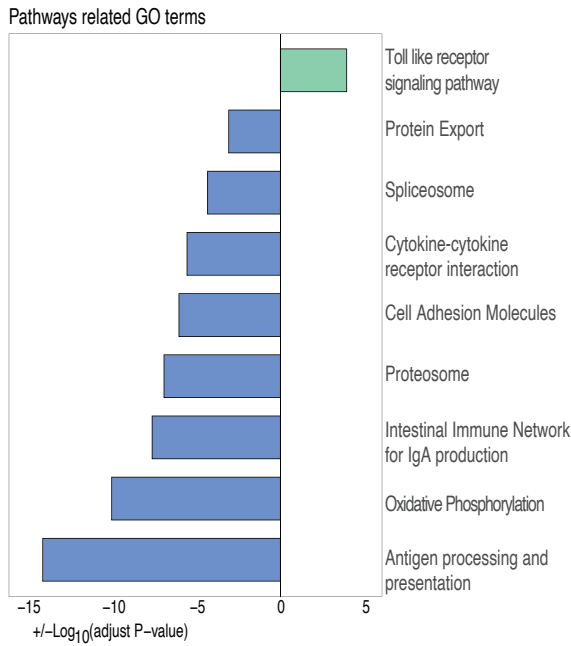

**b**

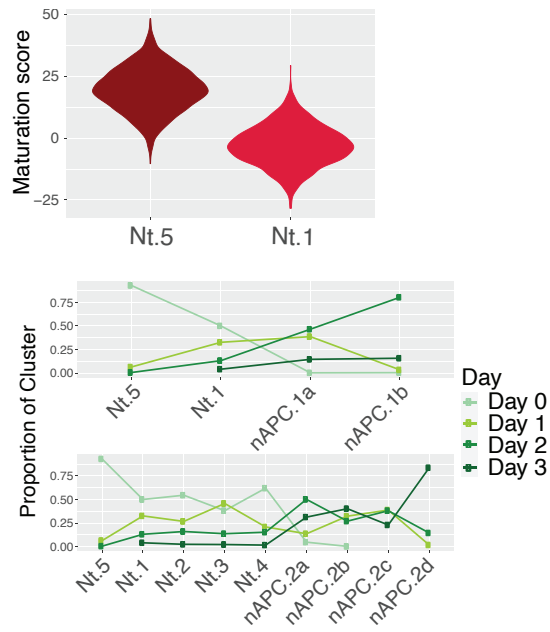

**c**

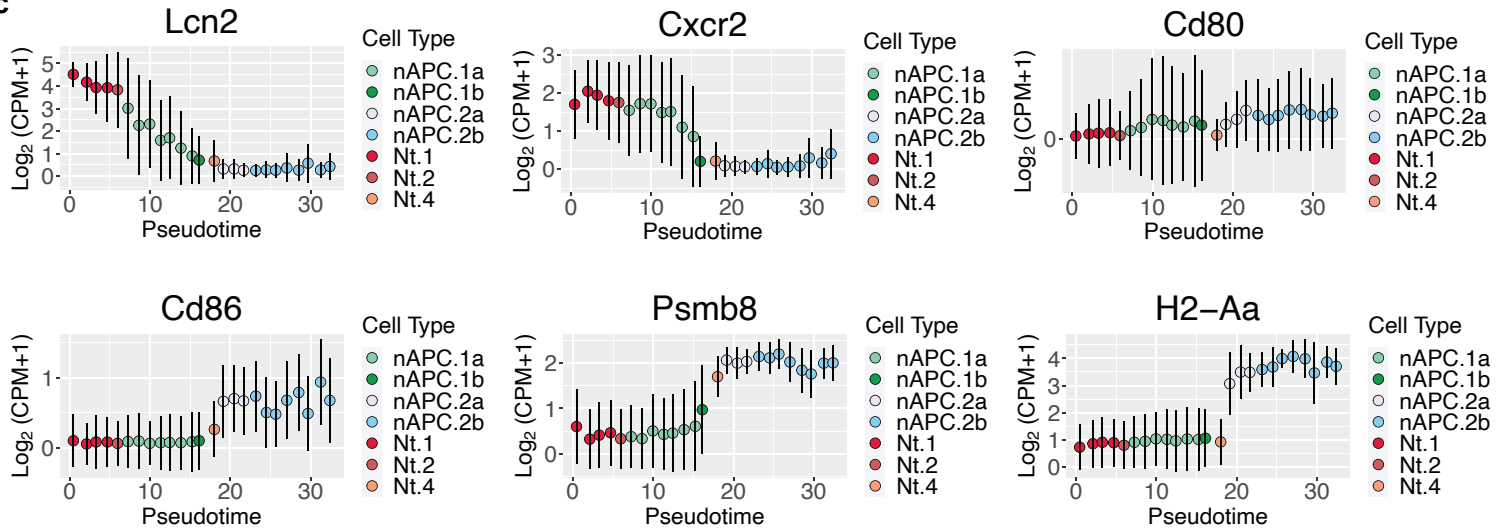

**d**

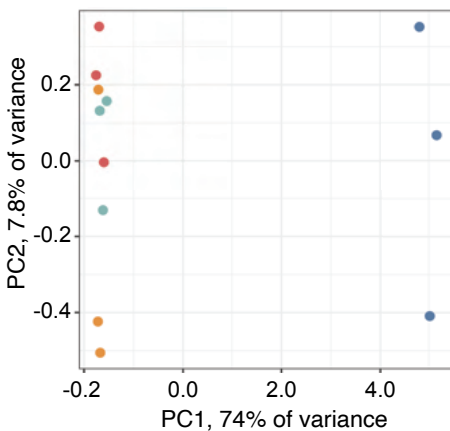

**Supplementary Figure 13 (associated with Figure 8). GSEA of variable genes, violin plots and PCA analysis. a) GSEA of all variable genes among nAPC1s (green) and nAPC2s (blue) (Left panel). b) Violin plot of maturation score for Nt.1 and Nt.5 subsets (top panel). Proportion of in vitro cells for each cell type split into two potential trajectories (bottom panel). c) Mean normalized expression of various markers binned along pseudo-time, d) Plot of PC1 vs. PC2 of PCA analysis on bulk data.**



## Supplementary Figure 14

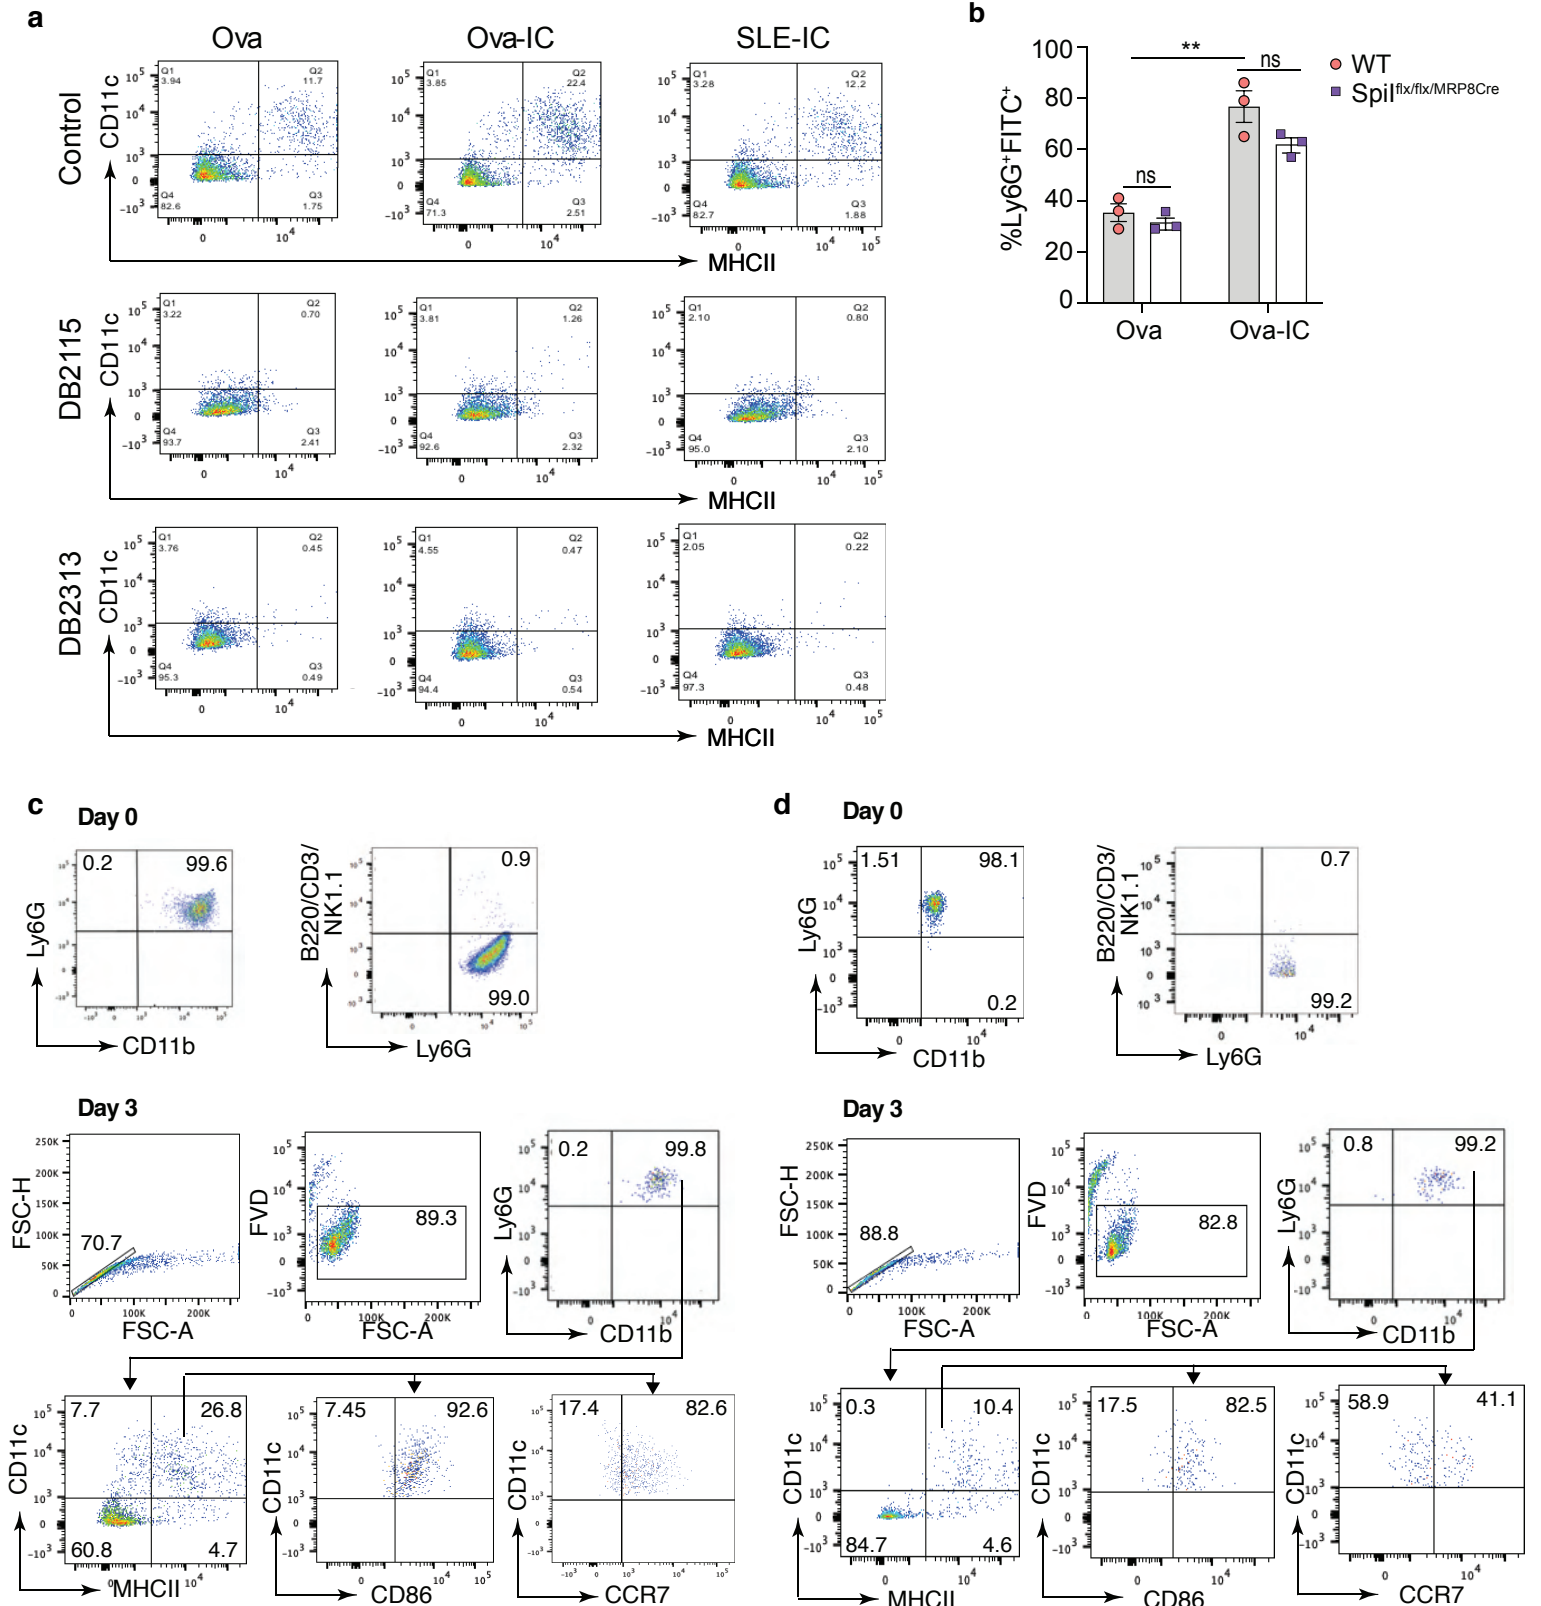

**Supplementary Figure 14 (associated with Figure 9). Analysis of wild-type neutrophils treated with PU.1 inhibitor and *Spi1*<sup>flx/flx/MRP8Cre</sup> deficient neutrophils. a) Representative profile of neutrophils from 2A3B/ $\gamma^{-/-}$  mice treated with Ova, Ova-IC or SLE-IC and subsequently cultured in vehicle alone (control) or PU.1 inhibitors, DB2115 or DB2313. b) Analysis of FITC-Ova- or FITC-Ova-IC uptake by WT and *Spi1*<sup>flx/flx/MRP8Cre</sup> deficient neutrophils after 2hrs of incubation. (c-d) Flow plots for day 0 neutrophils (top panel) and after day 3 in culture (bottom panel) to examine acquisition of nAPC markers in WT mice (c) and *Spi1*<sup>flx/flx/MRP8Cre</sup> (d) mice. Uptake was analyzed using One way ANOVA and Dunnett's multiple comparison test. \*\* $p < 0.005$ .**

**Supplementary Table 1. Demographic and clinical characteristics of study population**

|                        | <b>SLE patient (SLE)<br/>n=15</b> | <b>Normal (N)<br/>n=6</b> |
|------------------------|-----------------------------------|---------------------------|
| <b>Female (%)</b>      | 13 (86.6%)                        | 4 (66.6%)                 |
| <b>Age</b>             | 37.3 ± 4.2                        | 25.6 ± 1.1                |
| <b>SLEDAI (mean)</b>   | 6.26 ± 1.9                        |                           |
| <b>Nephritis n (%)</b> | 8 (53%)                           |                           |
| <b>C3 mg/dL</b>        | 90.6 ± 8.8                        |                           |
| <b>C4 mg/dL</b>        | 23.3 ± 3.8                        |                           |
| <b>dsDNA IU/mL</b>     | 84.1 ± 32.2                       |                           |
| <b>ESR mm/hr</b>       | 9.3 ± 4.4                         |                           |
| <b>CRP mg/L</b>        | 0.46 ± 0.15                       |                           |

*Abbreviations:* SLE, systemic lupus erythematosus; N, healthy control; SLEDAI, systemic lupus erythematosus disease activity index; dsDNA, double stranded DNA antibodies; ESR, erythrocyte sedimentation rate; CRP, C-reactive protein. Data is average ± SEM.

**Supplementary Table 2. Characteristics of patient samples from patients with myeloid neoplasias**

| <b>Patient</b> | <b>Age/Sex</b> | <b>Diagnosis</b>                   | <b>Pathogenic variants</b>                                                                                                                                         | <b>Differential cell count</b>                                                                                                    |
|----------------|----------------|------------------------------------|--------------------------------------------------------------------------------------------------------------------------------------------------------------------|-----------------------------------------------------------------------------------------------------------------------------------|
| <b>1</b>       | 57M            | <i>Primary myelofibrosis (MPN)</i> | ATM c.751_752delGT (p.C252*) 60% VAF (787x coverage)<br>JAK2 c.1849G>T (p.V617F) 47.3% VAF (970x coverage)                                                         | 69% neutrophils<br>6.2% bands<br>9.3% lymphocytes<br>5.4% monocytes<br>0.8% eosinophils<br>3.1% metamyelocytes<br>3.1% myelocytes |
| <b>2</b>       | 74F            | AML arising from myelodysplasia    | DNMT3A c.2645G>A (p.R882H) 47.2% VAF (1486x coverage)<br>RUNX1 c.530T>G (p.I177S) 27.5% VAF (641x coverage)<br>SF3B1 c.2098A>G (p.K700E) 38.1% VAF (651x coverage) | 27.5% neutrophils<br>18.3% lymphocytes<br>38.9% monocytes<br>14.5% blasts                                                         |

### Supplementary Table 3. Source table for antibodies used for flow cytometry

Source table for murine blood, bone marrow and cultured neutrophils and nAPCs

| Antibody                                                      | Fluorophore | Company     | Clone     | Cat#       | Dilution |
|---------------------------------------------------------------|-------------|-------------|-----------|------------|----------|
| CD3                                                           | BV605       | BioLegend   | 17A2      | 100237     | 1:100    |
| CD11c                                                         | BV605       | BioLegend   | N418      | 117334     | 1:100    |
| F4/80                                                         | BV605       | BioLegend   | BM8       | 123133     | 1:100    |
| CD80                                                          | BV605       | BioLegend   | 16-10A1   | 104729     | 1:100    |
| NK-1.1                                                        | BV605       | BioLegend   | PK136     | 108739     | 1:100    |
| Ly-6G                                                         | BV605       | BioLegend   | 1A8       | 127639     | 1:100    |
| CCR7                                                          | Pe/Cy7      | BioLegend   | 4B12      | 120123     | 1:100    |
| Ly-6G                                                         | PB          | BioLegend   | 1A8       | 127611     | 1:100    |
| Ly-6C                                                         | PB          | BD          | AI-21     | 562727     | 1:100    |
| CD11b                                                         | PB          | BioLegend   | M1/70     | 101224     | 1:100    |
| CD103                                                         | PB          | BioLegend   | 2E7       | 121421     | 1:100    |
| Ly-6C                                                         | PB          | BioLegend   | HK1.4     | 128013     | 1:100    |
| CD86                                                          | PB          | BioLegend   | GL-1      | 105022     | 1:100    |
| Ly-6G                                                         | Pe/Cy7      | BioLegend   | 1A8       | 127618     | 1:100    |
| CD115                                                         | Pe/Cy7      | BioLegend   | AFS98     | 135524     | 1:100    |
| CD40                                                          | Pe/Cy7      | BioLegend   | 3/23      | 124622     | 1:100    |
| CD103                                                         | Pe/Cy7      | BioLegend   | 2E7       | 121425     | 1:100    |
| CD11b                                                         | Pe/Cy7      | BioLegend   | M1/70     | 101216     | 1:100    |
| CD8a                                                          | Pe/Cy7      | BioLegend   | 53-6.7    | 100722     | 1:100    |
| CD8a                                                          | PerCP       | BioLegend   | 53-6.7    | 100732     | 1:100    |
| CCR7                                                          | PerCP       | BioLegend   | G043H7    | 353242     | 1:100    |
| MHC class II                                                  | PerCP       | BioLegend   | AF6-120.1 | 116415     | 1:100    |
| Ly-6G                                                         | PerCP       | BioLegend   | 1A8       | 127616     | 1:100    |
| Ly-6G                                                         | APC         | BioLegend   | 1A8       | 127614     | 1:100    |
| CD11c                                                         | APC         | BioLegend   | N418      | 117310     | 1:100    |
| Ly-6C                                                         | AF647       | BioLegend   | HK1.4     | 128009     | 1:100    |
| CD8a                                                          | APC         | BioLegend   | 53-6.7    | 100711     | 1:100    |
| CD115                                                         | APC         | BioLegend   | AFS98     | 135509     | 1:100    |
| CD11b                                                         | Pe          | BioLegend   | ICRF44    | 301306     | 1:100    |
| CD86                                                          | Pe          | BioLegend   | 34F       | 200308     | 1:100    |
| CCR7                                                          | Pe          | BioLegend   | 4B12      | 120105     | 1:100    |
| CD11c                                                         | Pe          | BioLegend   | N418      | 117307     | 1:100    |
| CD115                                                         | Pe          | eBioscience | AFS98     | 12-1152-82 | 1:100    |
| Ly-6G                                                         | FITC        | BioLegend   | 1A8       | 127606     | 1:100    |
| CD80                                                          | FITC        | BioLegend   | 16-10A1   | 104705     | 1:100    |
| CD8a                                                          | FITC        | BioLegend   | 5H10-1    | 100804     | 1:100    |
| H-2 K <sup>b</sup> Ova Tetramer<br>(Ova257-264<br>[SIINFEKL]) | Pe          | NIH         |           |            | 1:600    |
| CD3                                                           | BV605       | BioLegend   | 17A2      | 100237     | 1:100    |



|              |          |             |          |            |       |
|--------------|----------|-------------|----------|------------|-------|
| Foxp3        | PB       | BioLegend   | MF-14    | 126419     | 1:100 |
| CD69         | PB       | BioLegend   | H1.2F3   | 104527     | 1:100 |
| CD4          | PB       | BioLegend   | GK1.5    | 100443     | 1:100 |
| CD4          | PB       | BioLegend   | RM4-4    | 116008     | 1:100 |
| CD69         | Pe/Cy7   | BD          | H1.2F3   | 552879     | 1:100 |
| CD25         | Pe/Cy7   | BioLegend   | PC6.1    | 102016     | 1:100 |
| CD44         | Pe/Cy7   | BioLegend   | IM7      | 103030     | 1:100 |
| CD62l        | APC      | BioLegend   | MEL-14   | 104411     | 1:100 |
| Ki67         | PerCP    | BioLegend   | B56      | 561284     | 1:100 |
| T-bet        | AF647    | BioLegend   | 4B10     | 644803     | 1:100 |
| PD-1         | APC      | BioLegend   | RMP1-30  | 109112     | 1:100 |
| CTLA-4       | APC      | BioLegend   | UC10-4B9 | 106310     | 1:100 |
| CD3          | APC      | BioLegend   | 145-2C11 | 100311     | 1:100 |
| PD-1         | Pe       | BioLegend   | RMP1-14  | 114117     | 1:100 |
| MHC class II | Pe       | eBioscience | NIMR-4   | 12-5322-81 | 1:100 |
| CD25         | PE-CF594 | BD          | PC61     | 562695     | 1:100 |

**Supplementary Table 4. Source table for antibodies used for flow cytometry**

Source Table for human blood and cultured blood neutrophils and nAPC

| <b>Antibody</b> | <b>Fluorophore</b> | <b>Company</b>        | <b>Clone</b> | <b>Cat#</b> | <b>Dilution</b> |
|-----------------|--------------------|-----------------------|--------------|-------------|-----------------|
| CD80            | APC-H7             | BD                    | L307.4       | 561134      | 1:100           |
| XCR1            | Pe                 | BioLegend             | S15046E      | 762603      | 1:100           |
| CD86            | BV421              | BioLegend             | IT2.2        | 305426      | 1:100           |
| CD141           | Pe/Cy7             | BioLegend             | M80          | 344109      | 1:100           |
| CD11c           | BV421              | BD                    | 3.9          | 565807      | 1:100           |
| CD14            | APC                | BioLegend             | M5E2         | 301808      | 1:100           |
| CD15            | BV605              | BioLegend             | W6D3         | 323031      | 1:100           |
| CD10            | Pe                 | Ancell Corporation    | SN5c/L4-1A1  | 157-050     | 1:100           |
| SiglechH        | Pe                 | eBioscience           | eBio440c     | 12-0333-80  | 1:100           |
| CD11c           | APC/Cy7            | BioLegend             | Bu15         | 337218      | 1:100           |
| CD11b           | Pe                 | BioLegend             | ICRF44       | 301306      | 1:100           |
| HLA-DR          | Bv605              | BioLegend             | L243         | 307639      | 1:100           |
| Clec9a          | AF488              | R&D Systems           | 683409       | FAB6049G    | 1:100           |
| CD10            | BV421              | BD                    | H10a         | 562902      | 1:200           |
| CD11c           | AF647              | BioLegend             | 3.9          | 301619      | 1:100           |
| CD197           | BV421              | BD                    | 150503       | 562555      | 1:100           |
| CD80            | Pe/Cy7             | BioLegend             | 2D10         | 305218      | 1:100           |
| CD86            | PerCP              | BioLegend             | IT2.2        | 305419      | 1:100           |
| CD11b           | Pe/Cy7             | BioLegend             | M1/70        | 101216      | 1:100           |
| CD15            | PerCP              | BioLegend             | W6DE         | 323020      | 1:100           |
| Clec9A          | Pe                 | BioLegend             | 8F9          | 353803      | 1:100           |
| CD16            | Pe                 | BD                    | 3G8          | 555407      | 1:100           |
| CD32            | Pe                 | BD                    | FLI8.26      | 550586      | 1:100           |
| CD16            | APC Vio770         | MACS-MyLtenyi Biotech | REA589       | 130-109-147 | 1:100           |

**Supplementary Table 5. Source table for antibodies used for flow cytometry**

Source table for normal and SLE patient blood samples

| <b>Antibody</b> | <b>Fluorophore</b> | <b>Company</b> | <b>Clone</b> | <b>Cat#</b> | <b>Dilution</b> |
|-----------------|--------------------|----------------|--------------|-------------|-----------------|
| CD11c           | PE                 | BioLegend      | 301606       | 3.9         | 1:20            |
| CD10            | APC/Cy7            | BioLegend      | 312212       | HI10A       | 1:20            |
| CD15            | FITC               | BioLegend      | 301903       | HI98        | 1:100           |
| HLA-DR          | PE/Cy7             | BioLegend      | 307616       | L243        | 1:100           |
| CD3             | PerCP/Cy5.5        | BioLegend      | 300328       | HIT3a       | 1:100           |
| CD19            | PerCP/Cy5.5        | BioLegend      | 302230       | HIB19       | 1:100           |
| CD56            | PerCP/Cy5.5        | BioLegend      | 318322       | HCD56       | 1:100           |
| CD14            | Pacific Blue       | BioLegend      | 301828       | M5E2        | 1:100           |
| CD197 (CCR7)    | Pacific Blue       | BioLegend      | 353210       | G043H7      | 1:100           |
| CD80            | APC                | BioLegend      | 305220       | 2D10        | 1:100           |
| CD141           | BV605              | BD OptiBuild   | 740421       | 1A4         | 1:100           |
| CD370 (CleC9)   | APC                | BioLegend      | 353806       | 8F9         | 1:100           |

**Supplementary Table 6. Source table for antibodies used for flow cytometry**

Isotype controls and Fc block reagents

|                    |            |            |
|--------------------|------------|------------|
| Human TruStain FcX | Biolegend  | 422302     |
| Mouse BD Fc Block  | BD         | 553141     |
| Mouse IgG1k        | BD         | 557273     |
| Mouse IgG1k-FITC   | Invitrogen | 11-4714-81 |
