# Supplementary material for: FcγR engagement reprograms neutrophils into antigen cross-presenting cells that elicit acquired anti-tumor immunity
Source: PubMed Central journal article supplement (PMC8352912; doi:10.1038/s41467-021-24591-x), 2021-08-09
Supplement: 41467_2021_24591_MOESM4_ESM.pdf [file 41467_2021_24591_MOESM4_ESM.pdf]

## Description of Additional Supplementary Files

**Supplementary Data 1. Single cell RNAseq: Differentially expressed genes (DEGs) for each identified cell type cluster compared to all other clusters.**

**Supplementary Data 2. Pseudo-bulk RNAseq: Differentially expressed genes (DEGs) for nAPC1 vs. nAPC2.**

**Supplementary Data 3. List of genes used for trajectory score and maturation score.**

**Supplementary Data 4. Bulk RNAseq: Differentially expressed genes (DEGs) for each condition pairwise.**

**Supplementary Movie 1. Day 0 and Day 2 of peripheral blood neutrophils stimulated with SLE-IC imaged in Cy5 fluorescence filter set.** SYTO™ stained, peripheral blood neutrophils from CD11c-YFP mice stimulated with SLE-IC were washed and cultured for 2 days. Z-stack images were acquired at day 0 and 2 by confocal microscopy using Cy5 fluorescence filter sets. Open arrowheads, neutrophils.

**Supplementary Movie 2. Day 0 and Day 2 of peripheral blood neutrophils stimulated with SLE-IC imaged in Cy5 fluorescence filter set.** SYTO™ stained, peripheral blood neutrophils from CD11c-YFP mice stimulated with SLE-IC were washed and cultured for 2 days. Z-stack images were acquired at day 0 and 2 by confocal microscopy using YFP fluorescence filter sets. Closed arrows, YFP+ cells that are mononuclear in Supplementary Movie/Audio/Data 1 as also indicated in Figure 1f; Open arrows, YFP low cells that are mononuclear in Supplementary Movie/Audio/Data 1 that are not visible in Figure 1f.

**Supplementary Movie 3. Live cell imaging of peripheral blood neutrophils stimulated with SLE-IC.** SYTO stained, highly purified peripheral blood neutrophils from CD11c-YFP mice were stimulated with for 1.5hrs in a microfluidic device with traps, washed with media and imaged by confocal microscopy. Imaging commenced from the start of SLE-IC stimulation. Two z-stacks in Cy5 (with exception of first timepoint, which has 3 z-stacks) and one each in brightfield (BF) and YFP are shown. Note that the nuclear changes in Cy5 are also observed in brightfield (BF).

**Supplementary Movie 4. Intravital microscopy of interactions between adoptively transferred nAPCs and CD8 T cells in the popliteal lymph node.** OT-I-GFP CD8+ T cells (green) cluster around and make prolonged contacts with RFP-nAPCs (red), which extend long processes.

**Supplementary Movie 5. Intravital microscopy of adoptively transferred nAPCs and CD8 T cells in the popliteal lymph node.** In areas with no RFP-nAPCs, few OT-I-GFP CD8+ T cells (Green) are observed and they do not cluster.
